1 **KDM5-mediated activation of genes required for mitochondrial biology is necessary for**  
2 **viability in *Drosophila***

3

4 Michael F Rogers<sup>1</sup>, Owen J Marshall<sup>2</sup>, Julie Secombe<sup>1,3,4</sup>

5

6

7 <sup>1</sup>Department of Genetics, Albert Einstein College of Medicine, Bronx, NY, United States

8

9 <sup>2</sup>Menzies Institute for Medical Research, University of Tasmania, Hobart, Australia

10

11 <sup>3</sup>Dominick P. Purpura Department of Neuroscience, Albert Einstein College of Medicine, Bronx,  
12 NY, United States

13

14

15

16 <sup>4</sup> corresponding author: [Julie.secombe@einsteinmed.edu](mailto:Julie.secombe@einsteinmed.edu)

17

18 Running title: KDM5 functions in the prothoracic gland to regulate mitochondrial function.

19

20

21 **ABSTRACT**

22 The precise coordination of gene expression is critical for developmental programs, and histone  
23 modifying proteins play important, conserved roles in fine-tuning transcription for these  
24 processes. One such family of proteins are KDM5 enzymes that interact with chromatin through  
25 demethylating H3K4me3 as well as demethylase-independent mechanisms that remain less  
26 understood. The single *kdm5* ortholog in *Drosophila* is an essential gene that has crucial  
27 developmental roles in a neuroendocrine tissue, the prothoracic gland. To characterize the  
28 regulatory functions of KDM5, we examined its role in coordinating gene expression programs  
29 critical to cellular homeostasis and organismal viability in larval prothoracic gland cells. Utilizing  
30 targeted genetic experiments, we analyzed the relationship between critical cell signaling  
31 pathways, particularly MAPK, and the lethality caused by loss of *kdm5*. Integrating KDM5 genome  
32 binding and transcriptomic data revealed conserved and tissue-specific transcriptional programs  
33 regulated by KDM5. These experiments highlighted a role for KDM5 in regulating the expression  
34 of a set of genes critical for the function and maintenance of mitochondria. This gene expression  
35 program is key to the essential functions of KDM5, as expression of the mitochondrial biogenesis  
36 transcription factor Ets97D/Delg, the *Drosophila* homolog of GABP $\alpha$ , in prothoracic gland cells  
37 suppressed the lethality of *kdm5* null animals. Consistent with this, we observed morphological  
38 changes to mitochondria in the prothoracic gland of *kdm5* null mutant animals. Together, these  
39 data establish KDM5-mediated cellular functions that are both important for normal  
40 development and could also contribute to KDM5-linked disorders when dysregulated.

41

42

## 43 INTRODUCTION

44 Transcriptional regulators function as powerful gatekeepers that enable cells to access and utilize  
45 the information stored in the genome. The dynamics of chromatin organization and  
46 transcriptional mechanisms must therefore be carefully coordinated to orchestrate the gene  
47 expression programs required for proper development. Conversely, improper function of  
48 transcriptional regulators can underlie the defective cellular processes that lead to dysfunction  
49 and disease (Mirabella et al., 2016, Lee and Young, 2013). Within this realm of biology,  
50 chromatin-modifying proteins interface with histone protein tails through writing, reading, and  
51 erasing post-translational modifications to organize gene expression. KDM5 (Lysine Demethylase  
52 5) proteins are one such family of chromatin-modifiers that are named for their ability to remove  
53 trimethylation of lysine 4 on histone H3 (H3K4me3), a mark generally found near the  
54 transcriptional start sites of actively expressed genes (Chan et al., 2022).

55  
56 Mammalian cells encode four paralogous KDM5 proteins: KDM5A, KDM5B, KDM5C, and KDM5D.  
57 The importance of gene regulation by KDM5 family proteins is demonstrated by their links to  
58 human disorders. All four KDM5 genes have been observed to show altered expression across a  
59 variety of cancer types, of which breast and prostate cancer are the most well characterized  
60 (Ohguchi and Ohguchi, 2022, Blair et al., 2011). The relationship between KDM5A, KDM5B, and  
61 tumorigenesis appears to be primarily oncogenic, with a range of cancers showing increased  
62 expression of either of these two paralogs. Rather than being linked to the regulation of a single  
63 process in malignant cells, KDM5A and KDM5B contribute to many facets of tumorigenesis  
64 including the regulation of genes linked to cell cycle control, DNA repair and angiogenesis (Yoo  
65 et al., 2022, Ohguchi et al., 2021, Taylor-Papadimitriou and Burchell, 2022, Ohguchi and Ohguchi,  
66 2022). The roles of KDM5C and KDM5D in malignancies are less defined, although, in contrast to  
67 KDM5A and KDM5B, it is generally reduction of these proteins that is observed in various cancers,  
68 most notably renal carcinomas (Tricarico et al., 2020). The genetic association between KDM5  
69 proteins and neurodevelopmental disorders, including intellectual disability and autism spectrum  
70 disorders, is more clearly caused by loss of function variants in *KDM5A*, *KDM5B* or *KDM5C* (Hatch  
71 and Secombe, 2021, Yoo et al., 2022). Consistent with this, mouse and cell culture models have

72 shown that Kdm5A, Kdm5B and/or Kdm5C are needed for proper neuronal differentiation and  
73 morphology (Iwase et al., 2017, Iwase et al., 2016, Harrington et al., 2022, El Hayek et al., 2020).  
74 However, while KDM5 proteins are clearly required for normal brain function, the transcriptional  
75 programs critical for typical cognitive development remain unknown. It also remains unclear  
76 whether similar or distinct transcriptional programs etiologically link KDM5 to malignancies and  
77 to brain development. In this regard, it is notable that although cancer and intellectual disability  
78 have vastly different clinical manifestations, alterations in the activity of other regulatory factors,  
79 such as members of the MAPK/Ras (mitogen-activated protein kinase) and PI3K signaling  
80 cascades, are also linked to these same two disorders (Borrie et al., 2017). Thus, it remains  
81 possible that dysregulation of overlapping pathways contributes to both altered cognition and  
82 tumorigenesis.

83  
84 Defining precisely how changes to KDM5 protein function leads to cancer or intellectual disability  
85 would be greatly facilitated by efforts to understand the fundamental transcriptional activities of  
86 KDM5 proteins. To date, most attempts to define these links have focused on the canonical  
87 histone demethylase activity. However, it is becoming increasingly apparent that KDM5 and  
88 other chromatin-modifying proteins also perform important non-catalytic gene regulatory  
89 functions (Ohguchi and Ohguchi, 2022, Paroni et al., 2018, Cao et al., 2014, Aubert et al., 2019,  
90 Morgan and Shilatifard, 2023). Demethylase-dependent and independent activities of KDM5  
91 proteins have been shown to play roles in both cancer and intellectual disability (Iwase et al.,  
92 2007, Vallianatos et al., 2018, Paroni et al., 2018). This is also true in the animal model *Drosophila*  
93 *melanogaster*, which encodes a single KDM5 protein that is likely to function incorporating  
94 activities of all four mammalian paralogs. Establishing its critical role in developmental processes  
95 is the fact that a null allele in *Drosophila kdm5* (*kdm5<sup>140</sup>*) causes lethality during development  
96 (Drelon et al., 2018). The essential functions of KDM5 are independent of its enzymatic  
97 demethylase function, however, as animals harboring loss-of-function mutations in the  
98 enzymatic Jumonji C (JmjC) domain survive to adulthood (Drelon et al., 2018, Li et al., 2010).  
99 Characterizing the role of KDM5 during *Drosophila* development therefore provides an

100 opportunity to uncover new pathways and gene-regulatory mechanisms that will expand our  
101 understanding of this family of multi-domain proteins.

102

103 Several cell types in *Drosophila* have been shown to require KDM5 during development.  
104 Consistent with the established link between genetic variants in human *KDM5* genes and  
105 intellectual disability, KDM5 is necessary for proper neuronal development and functioning  
106 (Belalcazar et al., 2021, Hatch et al., 2021, Zamurrad et al., 2018). However, these neuronal  
107 activities of KDM5 are not necessarily involved in its essential developmental functions, as  
108 restoring *kdm5* expression pan-neuronally does not rescue lethality (Drelon et al., 2019). KDM5  
109 has also been linked to immune function in larval hemocytes, but, in a similar manner to neurons,  
110 this cell type does not account for its essential activities (Drelon et al., 2019, Moran et al., 2015).  
111 The only single tissue in which re-expression of *kdm5* is sufficient to rescue lethality is the  
112 prothoracic gland (Drelon et al., 2019). *kdm5<sup>140</sup>* (null) animals rescued by prothoracic gland-  
113 specific *kdm5* expression develop into adult flies, however, they survive at a lower frequency  
114 than animals expressing *kdm5* ubiquitously, which indicates that KDM5 also has essential  
115 developmental functions in other tissues. Nevertheless, this rescue demonstrates that within  
116 prothoracic gland cells, KDM5 regulates the expression of genes crucial to proper organismal  
117 development.

118

119 A neuroendocrine tissue, the prothoracic gland serves as a master coordinator of numerous  
120 intracellular cellular processes, tissue growth, and organismal transitions that are essential to  
121 development through its production of the steroid hormone ecdysone (Kamiyama and Niwa,  
122 2022, Texada et al., 2020). This tissue is also a well-established model for understanding how key  
123 signaling pathways are integrated to govern hormone dynamics and animal maturation, including  
124 the MAPK, Salvador-Warts-Hippo-Yorkie (SHW), target of rapamycin (TOR) and insulin and  
125 insulin-like signaling (IIS) cascades. These pathways are known to converge on cellular processes,  
126 such as autophagy, that are critical for regulating metabolism and hormone production in the  
127 prothoracic gland (Texada et al., 2019, Nagata et al., 2022, Moeller et al., 2017). Like KDM5 family  
128 proteins, the dysregulation of these pathways is implicated in human disorders including cancer

129 and neurodevelopmental disorders (Vithayathil et al., 2018, Kim and Choi, 2010, Zanconato et  
130 al., 2016, Tian et al., 2019, Williamson et al., 2014). Studying the functions of KDM5 in the  
131 prothoracic gland will therefore provide important information about the relationship between  
132 KDM5-regulated gene expression and these critical pathways.

133  
134 KDM5 plays at least two distinct roles in cells of the prothoracic gland. The first is in the regulation  
135 of larval growth rate. Although *kdm5* null mutants can eventually reach wild-type size and  
136 undergo metamorphosis, they take as much as twice the amount of time to progress through the  
137 stages of development and exhibit corresponding reduced ecdysone levels (Drelon et al., 2018).  
138 In this context, KDM5 promotes the endoreplication of prothoracic gland cells, which increases  
139 ploidy in order to maximally express ecdysone biosynthetic factors (Drelon et al., 2019, Ohhara  
140 et al., 2017, Ohhara et al., 2019). The role of KDM5 in facilitating normal growth rate, however,  
141 is separate to its role in survival, as restoring normal developmental timing to *kdm5* mutant  
142 animals does not alter their viability. The role of KDM5 in promoting animal survival does involve  
143 the MAPK signaling pathway, as *kdm5* null mutant animals show decreased MAPK signaling and  
144 activating this pathway in the prothoracic gland suppresses *kdm5* mutant lethality. However,  
145 whether this effect is specific to the MAPK pathway, and which downstream cellular processes  
146 link KDM5, MAPK, and viability, remain to be established.

147  
148 Here we examine KDM5 function in the prothoracic gland as a means to broadly understand how  
149 this chromatin modifier regulates critical cellular processes. Extending from our previous studies,  
150 we explore the role of the MAPK and parallel pathways in mediating the lethality caused by loss  
151 of *kdm5* by taking targeted approaches based on the known signaling cascades. We additionally  
152 take unbiased approaches to define the transcriptional targets of KDM5. Among these targets,  
153 we identified mitochondrial biology as a candidate process for which KDM5-mediated regulation  
154 could play critical roles during development. Reinforcing these connections, the lethality of the  
155 *kdm5* null allele can be suppressed by expression of Ets97D/Delg, the *Drosophila* homolog of GA  
156 Binding Protein Transcription Factor Subunit Alpha (GABP $\alpha$ ), a known activator of genes  
157 necessary for cellular respiration. Supporting this, prothoracic gland cells of *kdm5* mutant animals

158 show altered mitochondrial morphology dynamics. Together, this study provides new insights  
159 into the link between KDM5-regulated transcription, mitochondrial function, and vital cellular  
160 processes needed to coordinate development.

161 **RESULTS**

162 **Activating MAPK signaling suppresses *kdm5* null lethality independently of autophagy**  
163 **regulation.**

164 To better understand the critical developmental roles of KDM5, we first sought to further  
165 investigate the link between *kdm5*-induced lethality and activation of MAPK signaling (Drelon et  
166 al., 2019). From yeast to humans, the MAPK signaling cascade is used by cells to regulate a myriad  
167 of downstream cellular events in a context-dependent manner (Widmann et al., 1999, Yang et  
168 al., 2013, Eblen, 2018, Pan and O'Connor, 2021). In the prothoracic gland of *Drosophila*, the MAPK  
169 pathway is one of several signaling networks that regulates ecdysone biosynthesis (Fig. 1A). To  
170 further characterize the relationship between KDM5 and MAPK, we took a candidate-based  
171 approach, testing upstream and downstream components of this cascade for an effect on *kdm5*-  
172 induced lethality (Fig. 1B). We used spookier-Gal4 (*spok*-Gal4) to drive expression of transgenes  
173 in a tissue-specific manner within the prothoracic gland, hereafter written as “*spok*>*transgene*”  
174 (Fig. 1C) (Drelon et al., 2019, Shimell et al., 2018, Pan and O'Connor, 2021). As quantified  
175 previously, the ability of tested transgenes to mediate *kdm5*<sup>140</sup> (null allele) survival into  
176 adulthood was calculated, and for these experiments, this survival index was normalized to that  
177 observed by *spok*-Gal4-driven expression of KDM5 (% *spok*>*kdm5*, see Methods).

178  
179 Based on the suppression of *kdm5*<sup>140</sup> lethality by expression of the receptor tyrosine kinase (RTK)  
180 Torso and activated Ras (Ras<sup>V12</sup>) in Drelon et al. (2019), we tested whether other RTKs upstream  
181 of MAPK, or whether the downstream kinase ERK, could restore *kdm5*<sup>140</sup> viability (Drelon et al.,  
182 2019). In parallel to Torso, which receives neuronal stimulation via the prothoracicotropic  
183 hormone (PTTH) neurotransmitter, the anaplastic lymphoma kinase (Alk), epidermal growth  
184 factor receptor (Egfr), and PDGR and VEGF-receptor related (Pvr) RTKs can also activate MAPK  
185 signaling and impact ecdysone biosynthesis in response to extracellular inputs (Pan and  
186 O'Connor, 2021, Cruz et al., 2020). *spok*-Gal4-driven expression of wild-type or constitutively  
187 active (<sup>CA</sup>) forms of each of these receptors resulted in partial suppression of lethality with a mean  
188 survival index of 33.2% (Fig. 1D). Likewise, *spok*>*erk* and *spok*>*erk*<sup>CA</sup> resulted in survival indices of  
189 17.4% and 41.8%, respectively (Fig. 1E). While most MAPK transgenes tested significantly



190 restored *kdm5<sup>140</sup>* viability, none were as effective as Ras<sup>V12</sup>, which had an average survival index  
191 of 78.1% (Fig. 1E). This possibly reflects stronger activation of signaling by the Ras<sup>V12</sup> transgene,  
192 particularly due to the role of post-translational modifications in regulating the MAPK cascade.  
193 Similar to the rescue of *kdm5<sup>140</sup>* by expression of KDM5 in the prothoracic gland, adult flies  
194 obtained through expression of RTKs or ERK had successfully formed adult structures but with an  
195 outstretched wings phenotype and reduced lifespan (Supp Fig. 1) (Drelon et al., 2019). Combined,  
196 these data confirm that augmenting MAPK signaling through various means of activation, not  
197 only through the Torso-Ras axis, all restore *kdm5<sup>140</sup>* viability. The downstream effectors that  
198 mediate MAPK signaling in the prothoracic gland remain unknown; however, in other contexts,  
199 regulatory proteins such as Myc, the E2F1/DP heterodimer, and cell cycle mediators can be  
200 regulated by this cascade (Zhang and Liu, 2002). Because these specific transcription factors and  
201 cellular processes have also been associated with mammalian or *Drosophila* KDM5 function in  
202 other contexts, we next tested their ability to suppress *kdm5<sup>140</sup>* lethality (Secombe et al., 2007,  
203 Benevolenskaya et al., 2005, Drelon et al., 2019). Expression of Myc, E2F1 and DP, or Cyclin E did  
204 not alter *kdm5*-induced lethality, however, suggesting that other, unidentified regulators of gene  
205 expression function with KDM5 in the context of the prothoracic gland (Fig. 1F).

206  
207 To determine whether this relationship with *kdm5<sup>140</sup>* lethality is specific to the MAPK pathway,  
208 we examined other signaling pathways that mediate prothoracic gland function, many of which  
209 show extensive crosstalk (Fig. 1A). Specifically, we tested the insulin and insulin-like growth factor  
210 signaling (IIS), Salvador-Warts-Hippo-Yorkie (SWH), and the target of rapamycin (TOR) pathways.  
211 These three pathways are among the best characterized to date for their roles in the prothoracic  
212 gland, particularly in the regulation of homeostatic metabolic processes such as autophagy and  
213 lipid processing for hormone production (Texada et al., 2019, Danielsen et al., 2013, Danielsen et  
214 al., 2014, Danielsen et al., 2016). To test the IIS cascade, we expressed an activated form of the  
215 insulin receptor (*spok>InR<sup>CA</sup>*) or the downstream transcription factor foxo (*spok>foxo*).  
216 Expression of InR or foxo did result in suppression of *kdm5<sup>140</sup>* lethality with survival indices of  
217 65.6% and 24.8%, respectively (Fig. 1G). Though we previously saw no defective activation of the  
218 IIS pathway by phoso-Akt via Western blot in *kdm5<sup>140</sup>* animals in Drelon et al. (2019), it is possible

219 that ectopic insulin signaling activation can act on similar downstream targets or compensate in  
220 some other way for MAPK defects (Drelon et al., 2019). In contrast, SWH signaling, activated by  
221 expression of RNAi against Wts (*spok>wts-RNAi* #1 and 2) or overexpression of wild-type or  
222 constitutively active yki transgenes (*spok>yki*, *spok>yki<sup>CA</sup>*) did not consistently suppress lethality  
223 (Fig. 1G). For this pathway, suppression was limited to *yki<sup>CA</sup>*, which, similar to the IIS cascade, may  
224 indicate that activation of these signaling pathways is able to compensate for *kdm5<sup>140</sup>* MAPK  
225 defects. These results could be due to crosstalk between these pathways and/or upregulation of  
226 common inputs involved in regulation of ecdysone biosynthesis and prothoracic gland function.

227  
228 Additionally, prothoracic gland cells have distinct energetic and other cellular homeostatic  
229 requirements due to their status as terminally differentiated and large polyploid cells, and  
230 therefore proper balance of TOR signaling has been shown to be critical for tissue function  
231 (Danielsen et al., 2016, Texada et al., 2019, Pan et al., 2019, Yamanaka, 2021, Pan et al., 2020).  
232 For this reason, we tested several manipulations of TOR signaling and autophagy via both  
233 activation (*spok>Rheb*, *spok>S6K*, *spok>TSC-RNAi*) and repression (*spok>TOR<sup>DN</sup>*). Interestingly,  
234 none of these TOR pathway manipulations affected *kdm5<sup>140</sup>* lethality (Fig. 1H). Thus, while  
235 regulation of autophagy is one cellular process on which all of these signaling pathways are  
236 known to converge, the lethality of *kdm5<sup>140</sup>* mutants does not appear to be from lack of TOR  
237 pathway regulation. Taken together, there appear to be multiple pathways capable of  
238 suppressing *kdm5<sup>140</sup>* lethality via activity in the prothoracic gland, but it is not yet clear whether  
239 these results are due to crosstalk between pathways or compensatory activation of shared  
240 downstream targets. Moreover, it remains an open question which downstream transcription  
241 factors are responsible for the cellular programs activated by this signaling that are crucial for  
242 development and adult viability.

243

#### 244 ***kdm5* expression is required during mid to late larval stages for viability.**

245 Our candidate approaches identified regulatory pathways, but not key KDM5-mediated  
246 downstream processes linked to viability. We therefore performed transcriptomic and genomic-  
247 binding studies to investigate KDM5 function in an unbiased manner. Prior to carrying out these

248 molecular studies, we first needed to determine the periods during development in which KDM5  
249 is required. To do this, we ubiquitously expressed the UAS-*kdm5* transgene using *Ubi-Gal4* within  
250 defined windows of time during development in the *kdm5*<sup>140</sup> background (Fig. 2A). To facilitate  
251 temporal activation of *kdm5* expression, we included a transgene ubiquitously expressing  
252 temperature-sensitive Gal80<sup>ts</sup> (*tub-Gal80<sup>ts</sup>*) (McGuire et al., 2003). At 18°C, the Gal80<sup>ts</sup> prevents  
253 UAS-*kdm5* transgene activation, thus *kdm5*<sup>140</sup> animals with *tub-Gal80<sup>ts</sup>*, *Ubi-Gal4*, and UAS-*kdm5*  
254 incubated at 18°C fail to reach adulthood (Fig. 2A). At 29°C, Gal80<sup>ts</sup> is inactivated, which allows  
255 constitutive expression of the UAS-*kdm5* transgene and results in adult fly viability (Fig. 2A). At  
256 the permissive temperature of 29°C, we observe protein levels similar to both endogenous KDM5  
257 and to our previously published system in which flies were grown at 25°C without Gal80<sup>ts</sup> (Fig.  
258 2B) (Drelon et al., 2019). Using this system, *kdm5* expression was turned on at progressively later  
259 days during development by transferring the animals from 18°C to 29°C (modeled in Fig. 2A). The  
260 extent to which temporally-restricted expression of *kdm5* rescued viability is reported as a  
261 survival index normalized to the rescue observed by continuous expression of *kdm5* (*Ubi>kdm5*  
262 at constant 29°C, see Methods). Temperature shifting animals early in development led to robust  
263 rescue (Fig. 2C). In contrast, activating the UAS-*kdm5* transgene in animals that had reached mid  
264 larval stages (2<sup>nd</sup>-3<sup>rd</sup> instar) or later resulted in a failure to rescue adult viability (Fig. 2C). Thus,  
265 *kdm5* expression is required prior to pupal stages and as early as mid to late larval stages,  
266 although we cannot yet rule out additional roles later in development. Additional complementary  
267 experiments in which UAS-*kdm5* transgene expression was inhibited progressively later in  
268 development were also performed by shifting animals from 29°C to 18°C (modeled in Fig. 2A).  
269 These data revealed that transferring animals that had reached mid larval stages (2<sup>nd</sup>-3<sup>rd</sup> instar)  
270 or earlier failed to robustly rescue viability, confirming key role(s) for KDM5 during the mid to  
271 late larval window of the *Drosophila* life cycle (Fig. 2D). Based on this temporal rescue data, we  
272 focused subsequent experiments of KDM5 function during the late larval development.

273

#### 274 **KDM5 directly regulates transcription of metabolic processes in the prothoracic gland.**

275 To investigate the roles of KDM5 in regulating gene expression programs within the prothoracic  
276 gland, we identified genomic regions bound by KDM5 in this tissue. Traditional genomic binding

277 approaches such as CHIP-seq are limited for this small tissue that is comprised of ~50 cells. We  
278 therefore performed Targeted DamID (TaDa), which requires less input material and can be  
279 carried out with tissue and temporal-specific resolution, to survey the genomic targets of KDM5  
280 in these cells (Hatch et al., 2021, Marshall and Brand, 2015, Marshall and Brand, 2017, Marshall  
281 et al., 2016a). We used *spok*-Gal4 to drive expression of a UAS transgene encoding a Dam:KDM5  
282 fusion protein (or UAS-*dam* as the normalization control) exclusively in the prothoracic gland cells  
283 of wild-type animals. Using *tub*-Gal80<sup>ts</sup>, expression of Dam:KDM5 was restricted to the KDM5-  
284 critical late larval stages by shifting animals from 18°C to 29°C and collecting wander 3<sup>rd</sup> instar  
285 larvae (120-168 hours after egg laying (AEL) at 18°C) (Fig. 3A). Confirming the robustness of our  
286 data, quadruplicate TaDa replicates showed a very strong correlation, and an average Dam:KDM5  
287 binding profile was used for subsequent analyses (Supp Fig. 2). Similar to prior studies of KDM5  
288 family proteins across species, a majority of KDM5 binding occurred within the proximity of  
289 promoter regions, particularly at nucleosomes bordering transcriptional start sites (TSS) (Fig. 3B,  
290 C) (Hatch et al., 2021, Liu and Secombe, 2015, Lloret-Llinares et al., 2012, Beshiri et al., 2012,  
291 Iwase et al., 2016, Wang et al., 2023). This localization at or near promoters enabled us to  
292 unambiguously identify nearby genes as candidate targets of KDM5 regulation.

293  
294 In total, KDM5 peaks within the prothoracic gland mapped to 5815 genes using a cutoff of false  
295 discovery rate (FDR) < 0.01 (Table S1). Gene Ontology (GO) analyses for Biological Processes  
296 enriched in this gene list produced a range of terms including processes related to cellular  
297 transport, metabolism, and signaling (Fig. 3D, Table S3). To assess the KDM5 binding targets in  
298 the prothoracic gland in relation to other contexts, we compared these data to existing CHIP-seq  
299 and TaDa data sets from whole adult flies and ganglion mother cells (neuronal precursors),  
300 respectively (Hatch et al., 2021, Liu and Secombe, 2015) (Fig. 3E). This revealed a highly significant  
301 overlap via comparison between the prothoracic gland TaDa and either data set as well as a total  
302 of 2463 genes that were bound in all three data sets (42.3% of all prothoracic gland targets) (Fig.  
303 3F). This overlap of KDM5 targets may represent genes regulated by KDM5 across developmental  
304 stages and tissues. Overall, KDM5 appears to have the potential to regulate a large portion of the

305 coding genome in the prothoracic gland, and these data are consistent with KDM5 having both  
306 tissue-specific functions and functions that are common across cell types.

307

308 To determine the functional relationship between KDM5 binding and target gene expression in  
309 the prothoracic gland, we performed bulk RNA-seq on dissected ring glands of wild-type and  
310 *kdm5<sup>140</sup>* wandering 3<sup>rd</sup> instar larvae. Similar to previous transcriptional studies, mRNA-seq was  
311 carried out from dissected ring glands to assay the prothoracic gland transcriptome, as this cell  
312 type comprises the majority of the mass of the ring gland (Uryu et al., 2018, Christesen et al.,  
313 2017, Ou et al., 2016, Di Cara and King-Jones, 2016, Nakaoka et al., 2017). Using a stringent cutoff  
314 of FDR < 0.01, we identified 2424 differentially expressed genes (DEGs) in *kdm5<sup>140</sup>* ring glands,  
315 1276 of which were downregulated and 1148 that were upregulated (Fig. 4A, Table S2). To  
316 determine which genes were likely to be directly regulated by KDM5, we integrated this gene  
317 expression data with the genomic binding data. 1290 (53.2%) of the *kdm5<sup>140</sup>* DEGs had an  
318 associated KDM5 promoter peak based on the prothoracic gland TaDa data (Fig. 4A, B). As seen  
319 in previous *kdm5* mutant RNA-seq experiments, direct KDM5 targets exhibit relatively subtle  
320 changes to gene expression (downregulated direct DEG log<sub>2</sub>FC (log<sub>2</sub> Fold Change) average = -  
321 0.660, upregulated = 0.910), and the DEGs with the largest log<sub>2</sub>FC appear to be indirectly  
322 regulated by KDM5 (Fig. 4A) (Hatch et al., 2021, Belalcazar et al., 2021, Liu and Secombe, 2015,  
323 Zamurrad et al., 2018). Gene Ontology (GO) analyses of the full list of DEGs produced primarily  
324 metabolic terms, including biological processes involving mitochondria and lipid metabolism (Fig.  
325 4C, Table S3). The enrichment for these terms appeared to be driven by downregulated DEGs, as  
326 analysis of that subset produced many of the same GO terms, while upregulated genes featured  
327 GO biological processes involving cellular transport and chromatin dynamics (Fig. 4C'-C'', Table  
328 S3). Among the direct DEGs, there was a similar trend with the top GO analysis terms related to  
329 mitochondrial processes and cellular respiration (Fig. 4D-D'', Table S3). Taken together, these  
330 genome binding and transcriptomic analyses reveal that gene expression programs under the  
331 direct regulation of KDM5 span various cellular processes in the prothoracic gland, particularly  
332 those involving metabolism and mitochondria.

333

334 **KDM5-regulated transcription is developmentally required for proper mitochondrial dynamics.**

335 Our genome-wide analyses revealed that the transcriptional changes caused by the dysregulation  
336 of KDM5-mediated mechanisms in *kdm5<sup>140</sup>* mutants particularly affected mitochondria-related  
337 genes in the prothoracic gland. In addition to *Drosophila*, KDM5 proteins have been previously  
338 associated with mitochondrial activity in mammals and humans, although the mechanisms and  
339 biological implications of these connections remain unclear (Liu and Secombe, 2015, Varaljai et  
340 al., 2015, Liu et al., 2023). Within the Gene Ontology database, 353 *Drosophila* genes are  
341 classified in the mitochondrion biological processes category, and of these, 111 genes were  
342 differentially expressed in *kdm5<sup>140</sup>* animals (FDR < 0.01). Consistent with the GO analyses, the  
343 majority of these mitochondrial genes both showed downregulated expression across our RNA-  
344 seq replicates in *kdm5<sup>140</sup>* compared to wild type and were directly bound in the prothoracic gland  
345 TaDa data set (Fig. 4E). Investigation of known physical interactions within this downregulated  
346 mitochondrial gene set identified connections including components of Cytochrome c oxidase  
347 and ATP synthase complexes, as well as mitochondrial translation (Fig. 4F). This transcriptomic  
348 data suggests that a key role for KDM5 may be to maintain the expression of genes critical to  
349 mitochondrial biology, and this could contribute to its essential developmental activities.

350  
351 The large size of the polyploid prothoracic gland cells demands significant metabolic  
352 requirements to fuel the cellular processes contained within, and thus these cells may be  
353 particularly sensitive to perturbations in mitochondrial activity. In addition to generating key  
354 cellular metabolites, mitochondria in the prothoracic gland are important sites for Halloween  
355 gene (ecdysone hormone biosynthetic enzymes) activity in processing stored lipid precursors for  
356 hormone production (Sandoval et al., 2014, Jacobs et al., 2020, Pan et al., 2020). To test whether  
357 the gene expression changes associated with mitochondrial function were linked to the lethality  
358 caused by loss of *kdm5*, we sought genetic approaches aimed at attenuating this deficit. *spargel*  
359 (*srl*) and *Ets97D* (*Delg*), homologous to mammalian PGC1- $\alpha$  and GABP $\alpha$ /NRF-2, respectively, are  
360 known transcriptional activators of genes required for mitochondrial biosynthesis in *Drosophila*  
361 (Tiefenbock et al., 2010, Tain et al., 2017, Sainz de la Maza et al., 2022). Previously published  
362 microarray experiments showed that both proteins can activate many of the mitochondrial genes

363 found to be downregulated in *kdm5<sup>140</sup>* animals (Fig. 4F, highlighted in darker blue) (Tiefenbock  
364 et al., 2010). In light of this transcriptional data, we tested whether transgenic expression of *srl*  
365 or *Ets97D* in the prothoracic gland could restore viability to *kdm5<sup>140</sup>* animals. While *spok-Gal4*-  
366 driven expression of *srl* failed to suppress *kdm5<sup>140</sup>* lethality, significantly, expression of *Ets97D*  
367 did restore viability and produce adult flies (Fig. 5A, B''). This result provides evidence that the  
368 activation of mitochondrial function genes that are necessary for animal survival may be  
369 mediated by KDM5.

370

371 To assess whether *kdm5<sup>140</sup>* animals exhibited visible mitochondrial phenotypes, we expressed a  
372 UAS-*mitoGFP* reporter with *spok-Gal4* to examine mitochondrial networks in prothoracic gland  
373 cells (Fig. 5C). Assaying overall mitochondrial mass by quantifying the *mitoGFP* signal volume and  
374 mean intensity per cell revealed no differences between *kdm5<sup>140</sup>* and control animals, indicating  
375 no change in mitochondrial abundance (Fig. 5D, E). To assess mitochondrial energetics, we  
376 stained with MitoTracker Red, a reagent that is retained in the mitochondrial matrix of active  
377 mitochondria where the membrane is hyperpolarized (Wong et al., 2020). Similar to *mitoGFP*,  
378 the MitoTracker Red signal showed no significant changes at a tissue-wide level in terms of sum  
379 intensity per prothoracic gland cell nor mean intensity in *kdm5<sup>140</sup>* animals compared to controls  
380 (Fig. 5F, G). Focusing our analysis to the cellular scale, we examined the morphology of the  
381 *mitoGFP*-marked mitochondrial networks, defining them as tubular, fragmented, and  
382 intermediate, as has been done in previous studies (Fig. 5H) (Deng et al., 2015, Kashatus et al.,  
383 2015). Quantifying the cellular proportion of each morphological category, prothoracic glands  
384 from control animals display a majority of tubular cells with elongated and highly branched  
385 mitochondria (Fig. 5I). In contrast, *kdm5<sup>140</sup>* prothoracic glands showed a significant decrease in  
386 the proportion of tubular cells, with these glands featuring more rounded and isolated  
387 mitochondrial populations of the intermediate and fragmented categories. These results indicate  
388 that although there are no changes to overall abundance, mitochondrial biology is disrupted at  
389 the organelle level in *kdm5<sup>140</sup>* mutants. The increase in fragmented mitochondria in *kdm5<sup>140</sup>*  
390 could be due to defects in any of a number of mitochondrial dynamics including biosynthesis,  
391 fusion, or turnover or, alternatively, as a stress response to other cellular defects. Future analysis

392 of specific mitochondrial components and bioenergetic processes as well as phenomena such as  
393 ROS (reactive oxygen species) and ER (endoplasmic reticulum) stresses will be fundamental in  
394 better understanding these *kdm5*-induced defects. Taken together, our data show that KDM5  
395 transcriptional regulation in prothoracic gland cells is needed for mitochondrial homeostasis, and  
396 defects in mitochondria and cellular respiration in the prothoracic gland are key contributors to  
397 the lethality caused by loss of KDM5 (Fig. 6).

398

## 399 **DISCUSSION**

400 In this study, we incorporated unbiased genome-wide data with targeted genetic and cellular  
401 analyses in order to expand our understanding of how KDM5 functions to regulate critical  
402 cellular processes during development. While expression and phenotype data show that KDM5  
403 is important across many cell types, we focused this study on the prothoracic gland, where we  
404 have demonstrated that KDM5-regulated expression programs are important for survival  
405 (Drelon et al., 2019). This work has revealed important roles for KDM5 with respect to  
406 intracellular signaling and processes, notably MAPK and mitochondrial homeostasis. Consistent  
407 with our prior observation that loss of KDM5 resulted in reduced MAPK signaling, prothoracic  
408 gland-specific expression of MAPK-activating RTKs or ERK suppressed *kdm5<sup>140</sup>* (null) lethality  
409 (Drelon et al., 2019). Despite the energy-regulatory pathway of autophagy being one of the  
410 best characterized cellular processes downstream of signaling pathways in the prothoracic  
411 gland, enhancing or attenuating this process had no effect on the lethality of *kdm5<sup>140</sup>* animals.  
412 Instead, our KDM5 genomic binding and gene expression analyses point to a vital role for KDM5  
413 in the regulation of a range of metabolic processes needed for cellular homeostasis, particularly  
414 mitochondrial function. Confirming the importance of KDM5-regulated expression programs  
415 that support mitochondrial activity, we find morphological changes to these organelles.  
416 Moreover, these changes are likely to be important for KDM5's essential functions, as  
417 expression of the transcription factor Ets97D/GABP $\alpha$ , a known regulator of genes needed for  
418 mitochondrial function, suppressed *kdm5<sup>140</sup>* lethality.

419



420 This is not the first study to find an association between KDM5 proteins and the regulation of  
421 mitochondrial genes, which we have observed previously in adult flies, and others have seen  
422 with human KDM5A/RBP2 and KDM5C (Lopez-Bigas et al., 2008, Liu and Secombe, 2015, Liu et  
423 al., 2023, Varaljai et al., 2015, Kim et al., 2022). Muscle cells of adult flies harboring a  
424 hypomorphic combination of *kdm5* alleles showed abnormal mitochondrial shape, altered  
425 expression of redox-related genes, and increased sensitivity to oxidative stress (Liu et al., 2014,  
426 Liu and Secombe, 2015). Interestingly, most of the genes found to be altered in adult flies  
427 linked to altered cellular redox state do not overlap with those observed here in the prothoracic  
428 gland that were linked to respiratory chain complexes and translation. KDM5 is therefore likely  
429 to play different roles in distinct cell types. In human cells, the KDM5-mitochondria relationship  
430 has primarily been examined during the process of differentiation. While we observed KDM5 to  
431 be required for the activation of mitochondrial gene expression, in promonocytic (monocyte  
432 and macrophage precursors) and myogenic precursor cells, KDM5A represses mitochondrial  
433 genes (Lopez-Bigas et al., 2008, Varaljai et al., 2015). Consistent with the disparate changes to  
434 transcription, loss of *Drosophila* KDM5 and inhibition of human KDM5A led to distinct changes  
435 to mitochondrial morphology. Reducing KDM5A led to more dense tubular mitochondrial  
436 networks, while we observe mitochondrial fragmentation in prothoracic gland cells lacking all  
437 KDM5 function. In findings more similar with our data, KDM5C-deficient monocytes and  
438 osteoclasts have decreased mitochondrial gene expression resulting in decreased bioenergetic  
439 metabolism (Liu et al., 2023). Therefore, KDM5 proteins regulate the transcription of genes  
440 integral to mitochondrial function, but it is possible that whether this results in increased or  
441 decreased expression depends on the energy demands of a given cell type and/or the  
442 developmental cellular context. Indeed, it is notable that in muscle cell differentiation, KDM5A  
443 appears to function as part of an E2F/DP/pRb axis to regulate mitochondrial function in  
444 myogenic precursor cells, while we find that E2F1/DP does not suppress *kdm5*<sup>140</sup> lethality  
445 (Varaljai et al., 2015). Integrating these studies, it is apparent that mitochondrial and other  
446 metabolic genes are conserved targets of KDM5-mediated transcriptional regulation across  
447 species. Considering the breadth of KDM5 targets in the prothoracic gland TaDa data as well as  
448 others, KDM5 appears to occupy a large number of loci across the genome and may be utilized

449 by the cell in either activating or repressive mechanisms depending on the context of cellular  
450 conditions (Hatch et al., 2021, Liu and Secombe, 2015). Notably, prothoracic gland cells are  
451 terminally differentiated and polyploid, requiring different homeostatic dynamics than the  
452 differentiating precursor cells of the mammalian studies. This may lead to KDM5 interacting  
453 with distinct gene regulatory complexes, or possibly employing histone demethylase-  
454 dependent and independent activities to alter transcription. Indeed, based on our observation  
455 that flies lacking KDM5-mediated histone demethylase activity are viable, the regulation of  
456 mitochondrial-related genes in the prothoracic gland is expected to be independent of its  
457 enzymatic function (Drelon et al., 2019).

458  
459 The transcription factors *srl* (ortholog of mammalian PGC1 $\alpha$ ) and *Ets97D* (ortholog of  
460 mammalian GABP $\alpha$ ) are involved in the activation of many of the same genes required for  
461 mitochondrial function that are regulated by KDM5 (Tiefenbock et al., 2010). While we observe  
462 robust suppression of *kdm5<sup>140</sup>*-mediated lethality by expression of *Ets97D*, *srl* expression failed  
463 to do the same. This may reflect differences in the function of these transcription activators, or  
464 based on studies of PGC1 $\alpha$ , that post-translational modifications are particularly important for  
465 *srl* activity (Luo et al., 2019, Tain et al., 2017). While ectopic expression of *Ets97D* can  
466 compensate for the loss of KDM5 in the prothoracic gland, it is not clear whether *kdm5<sup>140</sup>*  
467 animals die due to reduced *Ets97D* activity, as expression of this gene was not altered in our  
468 RNA-seq data (Table S2). It remains possible that the level of *Ets97D* protein is altered by loss of  
469 KDM5, or that both *Ets97D* and KDM5 present at mitochondrial function genes promotes  
470 appropriate levels of gene activation. Defining the molecular details of the KDM5-*Ets97D*-  
471 mitochondrial pathway will require additional genetic and cell biological analyses.

472  
473 The simplest synthesis of our *kdm5<sup>140</sup>* suppression experiments is that KDM5 is needed for  
474 proper activation of the MAPK pathway and that this alters the activation of genes related to  
475 mitochondrial function, possibly through *Ets97D*. Similar to *Ets97D*, our RNA-seq data did not  
476 reveal significant changes to components of the MAPK pathway, thus it remains unknown  
477 precisely how KDM5 leads to altered signaling. The MAPK cascade inputs into many processes

478 across the cell, impacting metabolism through a variety of levels of regulation. While the  
479 relationships between MAPK and metabolic processes such as autophagy and glycolysis are  
480 more established in the literature, some studies have found direct connections between MAPK  
481 signals and mitochondrial biology (Kashatus et al., 2015, Javadov et al., 2014, Galli et al., 2009,  
482 Haq et al., 2013). In fact, most of the existing links between MAPK and mitochondria have been  
483 identified in the context of cancer cells and RASopathy developmental disorders. Mitochondrial  
484 dynamics can be altered in various cancers, and some studies have looked at mitochondria as a  
485 potential target to antagonize MAPK-driven tumors (Serasinghe et al., 2015, Marchetti et al.,  
486 2018, Ferraz et al., 2020, Corazao-Rozas et al., 2016). Furthermore, RASopathies, a collection of  
487 rare diseases driven by germline MAPK mutations, exhibit forms of mitochondrial dysfunction  
488 that contribute to bioenergetic defects (Kontaridis and Chennappan, 2022, Dard et al., 2018). In  
489 both instances of cancer and developmental disorders, KDM5 proteins may be involved in the  
490 regulation of this axis of MAPK-mediated metabolic changes. The potential role for KDM5 with  
491 both MAPK signaling and mitochondrial regulation indicates that there's potential to consider  
492 KDM5 when treating these disorders.

493  
494 One outstanding question in these studies of *kdm5*-induced lethality is what roles KDM5-  
495 mediated transcriptional programs play specifically within the prothoracic gland that are  
496 sufficient for these cells to rescue lethality at an organismal level. Anoar et al. (2021)  
497 hypothesize that neurons are particularly susceptible to mitochondrial defects because of high  
498 energetic demands and because as long-lived post-mitotic cells, they cannot dilute out  
499 defective organelles by cell division (Anoar et al., 2021). Similarly, prothoracic gland cells exit  
500 the cell cycle in the embryonic stage and must survive as large, polyploid cells with high  
501 bioenergetic requirements into pupal stages to coordinate the *Drosophila* developmental  
502 programs. KDM5-mediated mitochondrial regulation may be a key facet in the life cycle of the  
503 prothoracic gland cells in maintaining metabolic homeostasis as the cells undergo  
504 endoreplication and regulated production of the steroid hormone ecdysone. While these data  
505 suggest that raising *kdm5*<sup>140</sup> animals on food supplemented with ecdysone should suppress  
506 their lethality, this is not the case (Drelon et al., 2019). It is possible that ecdysone-

507 supplemented *kdm5<sup>140</sup>* animals fail to consume enough ecdysone to progress completely  
508 through pupal stages during which they must subsist entirely off stored nutrients. However,  
509 *kdm5<sup>140</sup>* animals are able to undergo metamorphosis and form adult structures when raised on  
510 standard food and therefore must have sufficient prothoracic gland capabilities to generate the  
511 large final metamorphic pulse of hormone. Alternatively, while *kdm5<sup>140</sup>* animals are able to  
512 stimulate gross adult structure formation, some of the finer details of the underlying tissue,  
513 particularly synapse formation between neurons in the brain and into peripheral tissues, may  
514 depend on not just the quantity of ecdysone hormone but also the specific timing of ecdysone  
515 pulses. During metamorphosis, the neuronal networks across the animal undergo significant  
516 growth, pruning, and synapse formation for innervation across the newly formed adult body  
517 (Truman and Riddiford, 2023). This neuronal patterning is coordinated in part by ecdysone-  
518 responsive transcriptional elements, and likely hinges on proper timing for synaptic inputs and  
519 outputs to meet appropriately. Overcoming the *kdm5*-dependent defects by transgene-  
520 mediated modulation of mitochondrial dynamics may restore prothoracic gland cell  
521 homeostasis and function sufficiently for the ecdysone production and release program to  
522 successfully guide this neuronal remodeling that needs to occur in pupae. Future studies  
523 analyzing the relationship between KDM5-regulated mechanisms, ecdysone temporal  
524 dynamics, and mitochondrial homeostasis in the prothoracic gland will be key in defining these  
525 essential developmental programs.

526

## 527 **MATERIALS AND METHODS**

### 528 **Fly husbandry**

529 All flies were kept at 25°C on standard food at 50% humidity and a 12 hour light/dark cycle unless  
530 otherwise stated. Food (per liter) contained 18 g yeast, 22 g molasses, 80 g malt extract, 9 g agar,  
531 65 g cornmeal, 2.3 g methyl para-benzoic acid and 6.35 mL propionic acid. For studies comparing  
532 wild-type and *kdm5<sup>140</sup>* mutant larvae, animals were matched for developmental stage, not  
533 chronological age, as we have done previously (Belalcazar et al., 2021, Drelon et al., 2018, Drelon  
534 et al., 2019, Hatch et al., 2021). Thus, at 25°C, control wandering 3<sup>rd</sup> instar larvae were collected  
535 ~120 hours after egg laying (AEL), while *kdm5<sup>140</sup>* larvae were collected ~168 hours AEL. For all

536 analyses, we used equal numbers of male and female animals and pooled data since we did not  
537 observe any sex-specific effects. In all experiments testing suppression of *kdm5<sup>140</sup>* lethality, vials  
538 resulting in  $n < 12$  or  $n > 80$  total eclosed adult flies were excluded from final analyses. This vial  
539 density was experimentally determined to be optimal for potential survival of *kdm5<sup>140</sup>* animals  
540 as under- or overcrowding outside this density introduced additional variables, including  
541 inconsistent food conditions and larval competition with control CyO-GFP (heterozygous)  
542 animals.

543

#### 544 **Fly strains and genetics**

545 A detailed list of the genotypes of the flies used in each figure is included in the Key Resources  
546 Table in the Appendix.

547 The *kdm5<sup>140</sup>* mutant allele, *kdm5:3xHA*, *UASp-kdm5:HA*, *UAS-LT3-dam:kdm5*, and genomic  
548 region *kdm5:HA* transgenes have previously been described (Drelon et al., 2018, Hatch et al.,  
549 2021, Navarro-Costa et al., 2016). The *spok-Gal4*, *UAS-torso*, *UAS-Alk*, and *UAS-Alk<sup>CA</sup>* lines were  
550 kindly shared by Michael O'Connor (U. Minnesota). The *UAS-srl* line was kindly shared by Grace  
551 Zhai (U. Miami) with permission from Christian Frei (U. Zurich). The *UAS-Ets97D* line was kindly  
552 shared by Martine Simonelig (Institut de Genetique Humaine) with permission from Christian  
553 Frei. The *UAS-LT3-dam* line was kindly shared by Andrea Brand (U. Cambridge, Gurdon). All other  
554 strains were obtained from the Bloomington *Drosophila* Stock Center (see Key Resources Table  
555 in the Appendix).

556

#### 557 **Immunohistochemistry**

558 Wandering 3<sup>rd</sup> instar larval brain-ring gland complexes were dissected in ice cold 1X phosphate  
559 buffered saline (PBS) and fixed in 4% paraformaldehyde (PFA) in PBS at room temperature for 20  
560 min. Samples were washed three times in 1X PBST (PBS + 0.1% Triton) for 10 min each. Brain-  
561 ring gland complexes were transferred to 0.5  $\mu$ L tubes for blocking in 1X PBST + 5% normal  
562 donkey serum (NDS) for 30 min, followed by primary antibody incubation overnight while  
563 rotating at 4°C. After three 15 min washes in 1X PBST, samples were incubated in secondary  
564 antibodies at room temperature rotating for 2 hours. Samples were then washed three times in

565 1X PBST and ring glands were dissected from brain tissue in ice cold 1X PBS. Finally, ring glands  
566 were mounted with Fluoromount-G DAPI (Southern Biotech), and slides were stored at 4°C for  
567 imaging within 1-3 days.

568 A similar protocol was followed for mitochondrial immunostaining with the following exceptions.  
569 Larval brain-ring gland complexes were dissected in ice cold 1X Schneider's Medium (Gibco,  
570 Thermo Fisher Scientific), and then incubated in 500 nM MitoTracker Red CMXRos (Invitrogen,  
571 diluted in 1X Schneider's Medium) for 30 min protected from light. After two 1X PBS washes,  
572 samples were fixed in 4% PFA in PBS. Additionally, after secondary antibody incubation, samples  
573 were washed five times in 1X PBST prior to mounting.

574 The following primary antibodies were used: mouse anti-HA (1:100, Cell Signaling Technology)  
575 and rabbit anti-GFP (1:100, Invitrogen). Primary antibodies were prepared in 5% NDS/PBST. The  
576 following secondary antibodies were used: goat anti-mouse Alexa-568 (1:500, Thermo Fisher  
577 Scientific) and goat anti-rabbit Alexa-488 (1:500, Thermo Fisher Scientific). Secondary antibodies  
578 were prepared in 5% NDS/PBST.

579

### 580 **Image Acquisition and Processing**

581 Images of prothoracic gland signaling pathway, pupal brain, and the model of KDM5 function in  
582 the prothoracic gland were created with BioRender.com. All tissue images were taken on a Nikon  
583 CSU-W1 Spinning Disk confocal microscope using a 100X immersion lens (NA = 1.45 oil) and 0.2  
584 um Z-step size. Adult fly images were obtained using a stereomicroscope Carl Zeiss Stereo  
585 Discovery V12 with 12.5X magnification and captured using AxioVision Release 4.8 software. All  
586 images were processed with ImageJ. All Venn diagrams were generated using the R package  
587 BioVenn (v1.1.3) (Hulsen et al., 2008). Figures were composed using Adobe Illustrator.

588

### 589 ***kdm5<sup>140</sup>* Lethality Suppression Experiments**

590 To identify signaling pathway components that suppressed *kdm5<sup>140</sup>* lethality, *kdm5<sup>140</sup> /CyO-GFP*;  
591 *spok-Gal4* flies were crossed with *kdm5<sup>140</sup>* flies carrying a UAS transgene and allowed to lay eggs  
592 for 48 hours at 25°C. Animals were kept at 25°C, and all eclosed adults were scored. Using  
593 Mendelian ratios, we estimated the number of *kdm5<sup>140</sup>* animals expected in each cross based on

594 the total internal control (CyO-GFP) adults eclosed as done previously (Drelon et al., 2019). The  
595 survival index was calculated as a percentage of the total viable (lethality-suppressed) *kdm5<sup>140</sup>*  
596 adults eclosed over the estimated number of *kdm5<sup>140</sup>* animals in the cross. Graphed survival index  
597 data points represent biological replicate crosses normalized to the positive control *spok>kdm5*  
598 rescue.

599

## 600 **Western Blotting**

601 For each sample, three male and three female adult heads (age 1-3 days) were homogenized in  
602 PBS, denatured in 1X loading buffer (3X Laemmli sample buffer containing 187.5 mM Tris, 6%  
603 SDS, 30% glycerol, 0.03% bromophenol blue, and 10%  $\beta$ -mercaptoethanol) at 95°C for 5 min, run  
604 on a 6% 1.5 mm gel, and transferred to a PVDF membrane. The following primary antibodies  
605 were used: mouse anti-HA (1:2000, Cell Signaling Technology) and mouse anti- $\alpha$ Tubulin  
606 (1:10000, DSHB). Secondary antibody used was rabbit anti-mouse (1:1000, Invitrogen). Blots  
607 were scanned and processed using Kwik Quant Imager (Kindle Biosciences) scanner.

608

## 609 **KDM5 Temporal Experiments**

610 To identify the developmental windows requiring *kdm5* expression, *kdm5<sup>140</sup>*, *Ubi-Gal4* / CyO-GFP  
611 flies were crossed with *tub-Gal80<sup>ts</sup>*, *kdm5<sup>140</sup>* / CyO-GFP ; *UAS-kdm5:HA* flies and allowed to lay  
612 eggs for ~12 hours at either 18°C or 29°C. Animals raised at 18°C were transferred to 29°C to  
613 induce the expression of the *kdm5* transgene, and all eclosed adult flies were scored. Conversely,  
614 animals raised at 29°C were transferred to 18°C to repress the expression of the *kdm5* transgene,  
615 and adults were scored in the same way. For 18°C to 29°C shifts, days 1-15 were tested with,  $n >$   
616 100 flies eclosed for each day of shift. For 29°C to 18°C shifts, days 1-12 were tested in the same  
617 manner. The survival indices for these crosses were calculated in the same method as the  
618 *kdm5<sup>140</sup>* lethality suppression experiments. Graphed survival index data points represent vial  
619 replicates normalized to the positive control *Ubi>kdm5* at constant 29°C rescue.

620

## 621 **Targeted DamID and analyses**

622 To profile the genomic regions bound by KDM5 in prothoracic gland cells, *tub-Gal80<sup>ts</sup>* ; *spok-Gal4*  
623 flies were crossed with flies carrying *UAS-LT3-dam* or *UAS-LT3-dam:kdm5* and allowed to lay eggs  
624 for 24 hours at 18°C. Animals were kept at 18°C for 5 days then transferred to 29°C for 2 days to  
625 induce the expression of the transgenes. Wandering 3<sup>rd</sup> instar larvae were collected, flash frozen  
626 on dry ice, and stored at -80°C.

627 Tissue processing was performed as previously described with the following modifications  
628 (Marshall et al., 2016a). TaDa was performed in quadruplicate with replicates of 100 larvae that  
629 were homogenized and digested in Proteinase K in samples of 50 larvae then pooled into  
630 replicates of 100 larvae prior to DNA extraction. Larvae were homogenized in 75  $\mu$ L UltraPure  
631 Distilled Water and 20  $\mu$ L 500 mM EDTA then digested with Proteinase K for 1.5 hours. DNA  
632 extraction was performed using the Zymo Quick-DNA Miniprep Plus Kit. DpnI digestion, PCR  
633 adaptor ligation, DpnII digestion, and PCR amplification were performed as described. DNA was  
634 sonicated using a Diagenode Bioruptor Pico for 6 cycles (30 sec on/90 sec off at 4°C), and DNA  
635 fragments were analyzed using an Agilent Bioanalyzer to confirm ~300 bp fragment size. DamID  
636 adaptor removal and DNA cleanup were performed as previously described, and samples were  
637 submitted to BGI Genomics for library construction and sequencing.

638 Libraries were prepared at BGI Genomics following a ChIP-seq workflow. DNA fragments were  
639 first end-repaired and dA-tailed using End Repair and A-Tailing (ERAT) enzyme. Adaptors were  
640 then ligated for sequencing and ligated DNA purified using AMPure beads. DNA was then PCR  
641 amplified with BGI primers for 8 cycles and PCR purified with AMPure beads. DNA was then  
642 homogenized, circularized, digested, and again purified. DNA was then prepared into proprietary  
643 DNA nanoballs (DNB™) for sequencing on a DNBSEQ-G400 platform with 50 bp single-end read  
644 length and 20M clean reads passing filter.

645 For targeted DamID analyses, sequencing data were aligned to the Dm6 *Drosophila melanogaster*  
646 genome and processed using `damidseq_pipeline` as previously described (Marshall and Brand,  
647 2015, Marshall et al., 2016a, Marshall and Brand, 2017). After converting to bedgraphs via  
648 `damidseq_pipeline`, peaks were called using `find_peaks` (using the parameters `fdr = 0.01`,  
649 `min_quant = 0.9`) on the averaged replicates, and genes overlapping peaks identified using  
650 `peaks2genes` (Marshall et al., 2016a, Marshall et al., 2016b).



651 For genome localization analyses, the R package ChIPseeker (v1.34.1) was used with the average  
652 KDM5 binding BED file to generate profiles (Wang et al., 2022). Gene Ontology (GO) enrichment  
653 analysis of KDM5 bound genes (FDR < 0.01) utilized GO DAVID database (v2021), specifically  
654 annotation GOTERM\_BP\_DIRECT (Sherman et al., 2022). Genome browser image was generated  
655 using pyGenomeTracks (v3.8) utilizing BedGraph or bigWig files from: adult fly KDM5 ChIP-seq  
656 ([SRX1084165](#)) and larval neuronal precursor KDM5 TaDa ([GSE166116](#)) (Lopez-Delisle et al., 2020).

657

### 658 **RNA sequencing**

659 RNA sequencing (RNA-seq) was carried out on pooled ring glands dissected from control (*w<sup>1118</sup>*)  
660 and *kdm5<sup>140</sup>* wandering 3<sup>rd</sup> instar larvae. Ring glands were dissected and washed three times in  
661 ice cold 1X PBS, transferred to TRIzol, flash frozen on dry ice, and stored at -80°C. 80 dissected  
662 ring glands were pooled to form each of the four replicates. Total RNA was isolated with TRIzol  
663 and Phasemaker tubes (Invitrogen), and quality was assessed by Agilent Bioanalyzer before  
664 sending to Novogene for library construction and sequencing. mRNA was purified from total RNA  
665 using poly-T oligo-attached magnetic beads. After mRNA fragmentation, first strand cDNA and  
666 second strand cDNA were synthesized, and cDNA fragments were purified with AMPure XP  
667 system to select for suitable sizes for PCR amplification. Library quality was assessed on the  
668 Agilent Bioanalyzer 2100 system. Libraries were sequenced on the Illumina NovaSeq PE150  
669 platform (2 x 150bp cycles). Alignment of raw reads to the reference genome (dm6) was  
670 performed using Hisat2 (v2.0.5) for mapping, assembly via StringTie (v1.3.3b), quantification via  
671 featureCounts (v1.5.0-p3), normalized, and differential expression was determined with the  
672 DESeq2 package (1.20.0) (Pertea et al., 2016, Love et al., 2014, Liao et al., 2013).

673 Gene Ontology enrichment analysis of protein-coding genes found to be dysregulated in *kdm5<sup>140</sup>*  
674 RNA-seq data (1% FDR cutoff) was carried out using GO DAVID annotation GOTERM\_BP\_DIRECT  
675 (Sherman et al., 2022). The heatmap was generated using the R package pheatmap (v1.0.12)  
676 (Kolde, 2012). Physical interaction networks were determined using String and visualized using  
677 Cytoscape (v3.9.1) (Shannon et al., 2003).

678

### 679 **Quantification and statistical analyses**

680 All experiments were carried out in biological triplicate (minimum) and numbers (*n*) are provided  
681 for each experiment in the Figure Legends.

682 For *kdm5<sup>140</sup>* lethality suppression experiments, a Fisher's exact test was performed in R Studio  
683 (v2023.03.0) comparing survival index of each genotype to the no UAS control genotype as done  
684 previously with \*\*\*\**p*<0.0001, \*\*\**p*<0.001, \*\**p*<0.01, \**p*<0.05; ns, not significant (Drelon et al.,  
685 2019, RStudio, 2020). For KDM5 binding Venn Diagram overlap, a Fisher's exact test was  
686 performed in R Studio.

687 For mitoGFP and MitoTracker Red fluorescent images, the control genotype used was  
688 *kdm5<sup>140</sup>/CyO-GFP* heterozygous animals that developed from the same cross alongside the  
689 *kdm5<sup>140</sup>* homozygous animals because we have not seen the same developmental and lethality  
690 phenotypes from these animals (Drelon et al., 2019). Volocity software was used to quantify the  
691 intensity and 3-dimensional volume of the fluorescent signal in each channel. Student's *t*-test  
692 comparing control and *kdm5<sup>140</sup>* genotypes was performed in GraphPad Prism (v9.5.1) (GraphPad,  
693 2023). mitoGFP morphological quantifications were performed as follows. All images were  
694 blinded to genotype and analyzed at two Z-slice locations positioned 33% and 66% through the  
695 full Z-plane of the sample. At each Z-slice, all cells with nuclei clearly visible by DAPI signal at that  
696 Z-position were identified and classified for mitochondrial morphology of tubular, intermediate,  
697 or fragmented by scrolling through the Z-slices occupied by each identified cell. Tubular  
698 morphology consisted of zero visible fragmented round mitochondria, intermediate morphology  
699 consisted of primarily tubular morphology with >1 visible fragmented mitochondria, and  
700 fragmented morphology consisted primarily of fragmented mitochondria. The proportion of cells  
701 with each morphological classification was calculated per sample (individual prothoracic gland),  
702 and a parametric unpaired *t*-test was performed in GraphPad Prism comparing each  
703 morphological category between control and *kdm5<sup>140</sup>* animals.

704

## 705 **AUTHOR CONTRIBUTIONS**

706 Conceptualization, M.F.R., J.S.; Methodology, M.F.R., O.J.M.; Investigation, M.F.R., O.J.M. and  
707 J.S.; Writing – original draft, M.F.R. and J.S., Writing – Reviewing and Editing, M.F.R., J.S., and  
708 O.J.M.; Funding acquisition, J.S. and O.J.M, Supervision, J.S. and O.J.M

709

710 **DECLARATIONS**

711 **Ethics approval and consent to participate**

712 N/A

713

714 **Competing interests**

715 The authors declare no competing interests.

716

717 **Funding**

718 This research was supported by the NIH T32GM007288 to M.F.R, NHMRC APP1185220 to O.J.M.,  
719 and NIH R01GM112783 and the Irma T. Hirschl Trust to J.S.

720

721 **Availability of data and materials**

722 KDM5 binding (TaDa) and gene expression (RNA-seq) data have been deposited in the Gene  
723 Expression Omnibus (GEO) under SuperSeries accession numbers [GSE229077](https://www.ncbi.nlm.nih.gov/geo/query/acc.cgi?acc=GSE229077). Transgenic fly  
724 strains used in this research are available upon request to Julie Secombe  
725 (Julie.secombe@einsteinmed.edu).

726

727

728 **Acknowledgements**

729 We thank members of the Secombe and Baker labs for their intellectual contributions to this  
730 project and comments on the manuscript. We also thank Andrea Briceno, Hillary Guzik, and Vera  
731 Desmarais of the Einstein Analytical Imaging Facility (AIF) for the confocal microscope training  
732 and technical assistance with capturing and quantifying images (NCI P30CA013330). We thank  
733 Melissa Fazari, Mimi Kim, Jaeun Choi, Kenny Ye, and Abdissa Negassa of the Einstein Statistics  
734 Consulting Center for assistance with experimental design and statistical analyses. We also  
735 appreciate the availability of stocks from the Bloomington *Drosophila* Stock Center (NIH  
736 P40OD018537) and are grateful to the Einstein Cancer Center Support Grant P30CA013330.

737

738

739 **FIGURE LEGENDS**

740 **Figure 1: MAPK signaling robustly suppresses *kdm5<sup>140</sup>* lethality independent of autophagy**  
741 **regulation.**

742 (A) Schematic summarizing major cellular signaling pathways known to regulate prothoracic  
743 gland cell function. Potential crosstalk interactions and common targets between  
744 pathways indicated by black arrows. Created with BioRender.

745 (B) Schematic summarizing previous findings from Drelon et al. (2019) of *kdm5<sup>140</sup>* pupal  
746 pharate lethality suppression by transgene expression, including MAPK signaling via  
747 RasV<sup>12</sup>.

748 (C) Maximum intensity Z-projection image of brain-ring gland complex of wandering L3  
749 larva shows expression of endogenously-tagged KDM5:HA in the nuclei of the  
750 prothoracic gland. Prothoracic gland marked by *spok*-Gal4-driven GFP expression and  
751 nuclei marked by DAPI stain. Scale bars represent 50  $\mu$ m.

752 (C) Quantification of survival index for expression of MAPK-activating RTKs in *kdm5<sup>140</sup>*  
753 background relative to *spok*-Gal4>UAS-*kdm5* (green data points). n = 191-722 (mean n =  
754 509) per genotype tested. \*\*\*\*p<0.0001, \*\*\*p<0.001, \*\*p<0.01, \*p<0.05; ns, not  
755 significant (Fisher's exact test compared to no UAS control (black data points)). Error  
756 bars: mean + s.e.m.

757 (D) Quantification of survival index for expression of MAPK signaling components in *kdm5<sup>140</sup>*  
758 background relative to *spok*-Gal4>UAS-*kdm5*. n = 467-800 (mean n = 627) per genotype  
759 tested. \*\*\*\*p<0.0001, \*\*p<0.01; ns, not significant (Fisher's exact test compared to no  
760 UAS control). Error bars: mean + s.e.m.

761 (E) Quantification of survival index for expression of candidate factors downstream of  
762 MAPK in *kdm5<sup>140</sup>* background relative to *spok*-Gal4>UAS-*kdm5*. n = 283-484 (mean n =  
763 378) per genotype tested. ns, not significant (Fisher's exact test compared to no UAS  
764 control). Error bars: mean + s.e.m.

765 (F) Quantification of survival index for expression of IIS (insulin and insulin-like signaling)  
766 and SWH (Salvador-Warts-Hippo-Yorkie) signaling components in *kdm5<sup>140</sup>* background

767 relative to *spok-Gal4>UAS-kdm5*. n = 292-921 (mean n = 466) per genotype tested.  
768 \*\*\*p<0.001, \*p<0.05; ns, not significant (Fisher's exact test compared to no UAS  
769 control). Error bars: mean + s.e.m.  
770 (G) Quantification of survival index for expression of autophagy-regulating components of  
771 TOR signaling in *kdm5<sup>140</sup>* background relative to *spok-Gal4>UAS-kdm5*. n = 352-926  
772 (mean n = 638) per genotype tested. ns, not significant (Fisher's exact test compared to  
773 no UAS control). Error bars: mean + s.e.m.

774

775 **Figure 2: Temporally-restricted rescue KDM5 expression reveals requirements for KDM5 in**  
776 **mid-to-late larval stages.**

777 (A) Schematic demonstrating vial shifts between restrictive (18°C) and permissive (29°C)  
778 temperatures to constrain rescue KDM5 expression within defined developmental  
779 windows.  
780 (B) Western blot of adult heads showing comparable KDM5:HA protein levels (top) across  
781 control (*kdm5:3xHA* or *Ubi>kdm5:HA* (*kdm5<sup>140</sup>* background)) and temporal experiment  
782 (*G80<sup>ts</sup> Ubi>kdm5:HA* (*kdm5<sup>140</sup>* background)) animals at standard (25°C) and  
783 experimental (29°C) temperatures.  $\alpha$ -tubulin loading control.  
784 (C) Quantification of survival index for induction of expression of KDM5 at progressively  
785 later days during development (18°C to 29°C) in *tub-Gal80<sup>ts</sup> / + ; kdm5<sup>140</sup>, Ubi-Gal4 /*  
786 *kdm5<sup>140</sup> ; UAS-kdm5:HA / +* animals relative to that of control vials kept at constant  
787 29°C. X-axis schematic demonstrates developmental progression of *kdm5<sup>140</sup>* animals at  
788 18°C at each day after egg lay (AEL). n = 101-275 (mean n = 153) per genotype tested.  
789 Error bars: mean + s.e.m.  
790 (D) Quantification of survival index for inhibition of expression of KDM5 at progressively  
791 earlier days during development (29°C to 18°C) in *tub-Gal80<sup>ts</sup> / + ; kdm5<sup>140</sup>, Ubi-Gal4 /*  
792 *kdm5<sup>140</sup> ; UAS-kdm5:HA / +* animals relative to that of control vials kept at constant  
793 29°C. X-axis schematic demonstrates developmental progression of *kdm5<sup>140</sup>* animals at  
794 29°C at each day after egg lay (AEL). n = 103-210 (mean n = 128) per genotype tested.  
795 Error bars: mean + s.e.m.

796

797

798 **Figure 3: Genome binding profiling of KDM5 by targeted DamID identifies both conserved and**  
799 **tissue-specific target genes.**

800 (A) Schematic demonstrating time course of Targeted DamID (TaDa) experiment, which  
801 restricted *spok*-Gal4-driven transgene expression (UAS-*dam:kdm5* or UAS-*dam*) to last  
802 48 hours of larval development. The TaDa experiment was performed in quadruplicate  
803 for each genotype with n=100 larvae per sample.

804 (B) Genomic binding localization of average Dam:KDM5 TaDa profile (generated from four  
805 normalized replicates) showing enhanced binding near the TSS.

806 (C) Distribution of Dam:KDM5 binding genomic regions showing enrichment for promoter-  
807 proximal regions.

808 (D) Gene Ontology Biological Process (GO-BP) analyses of candidate KDM5 target genes  
809 identified from Dam:KDM5 TaDa. Representative terms shown, full list in Table S3.

810 (E) Representative genome browser image showing binding of KDM5 in prothoracic gland  
811 TaDa experiment juxtaposed with published data sets from whole adult KDM5 ChIP-seq  
812 and ganglion mother cell TaDa.

813 (F) Venn diagram showing strong overlap of KDM5-bound genes in prothoracic gland cells,  
814 whole adults, and ganglion mother cells. Prothoracic Gland TaDa: Whole Adult ChIP  
815 bound gene overlap  $p < 0.00001$ ; Prothoracic Gland TaDa: GMC TaDa bound gene overlap  
816  $p < 0.00001$  (Fisher's exact test).

817

818 **Figure 4: Changes to the transcriptome via bulk RNA-seq reveals transcriptional dysregulation**  
819 **of mitochondrial genes in *kdm5<sup>140</sup>* mutants.**

820 (A) Volcano plot of differentially expressed genes (DEGs) between *kdm5<sup>140</sup>* and wild-type  
821 wandering 3<sup>rd</sup> instar larval ring glands. Genes with a false discovery rate (FDR)  $< 0.01$  are  
822 colored blue (downregulated) and red (upregulated), and those directly bound in KDM5  
823 TaDa are highlighted as bolded circles. RNA-seq was performed in quadruplicate for  
824 each genotype with n=80 ring glands per sample.

- 825 (B) Venn diagram showing overlap of DEGs in *kdm5<sup>140</sup>* ring glands and direct KDM5 targets  
826 identified in prothoracic gland TaDa.
- 827 (C-C'') Gene Ontology Biological Process (GO-BP) analyses of DEGs in *kdm5<sup>140</sup>* ring glands. All  
828 DEGs (B), downregulated DEGs (B'), and upregulated DEGs (B'') subsets were analyzed  
829 using GO DAVID. Representative terms shown, full lists in Table S3.
- 830 (D-D'') Gene Ontology Biological Process (GO-BP) analyses of DEGs that were directly bound  
831 in Dam:KDM5 prothoracic gland TaDa. All direct DEGs (B), downregulated direct DEGs  
832 (B'), and upregulated direct DEGs (B'') subsets were analyzed using GO DAVID.  
833 Representative terms shown, full lists in Table S3.
- 834 (E) Heatmap showing RNA-seq FPKM (Fragments Per Kilobase of transcript per Million  
835 mapped reads) of 111 genes from the mitochondrion GO term that were differentially  
836 expressed (FDR <0.01) in *kdm5<sup>140</sup>* ring glands. KDM5-bound genes in prothoracic gland  
837 TaDa are annotated in green in the column on the left side.
- 838 (F) Physical protein interaction networks of mitochondrial genes downregulated in *kdm5<sup>140</sup>*  
839 ring glands. Genes potentially regulated by both KDM5 and srl/Ets97D (from microarray  
840 data in Tiefenbock et al. 2010)) are highlighted with darker blue nodes. Single nodes  
841 without physical connection edges excluded from image. Created with Cytoscape.  
842

843 **Figure 5: KDM5 regulates mitochondrial dynamics in the prothoracic gland that are critical for**  
844 **development.**

- 845 (A) Quantification of survival index for expression of mitochondrial biogenesis factors in  
846 *kdm5<sup>140</sup>* background relative to *spok-Gal4>UAS-kdm5*. n = 757-922 (mean n = 840) per  
847 genotype tested. \*\*p<0.01; ns, not significant (Fisher's exact test compared to no UAS  
848 control). Error bars: mean + s.e.m.
- 849 (B-B'') Representative images of *kdm5<sup>140</sup>* adult flies with lethality suppressed by genomic  
850 region *kdm5:HA* transgene (B), *spok>kdm5* (B'), and *spok>Ets97D* (B'') . Scale bars  
851 represent 750  $\mu$ m.

- 852 (C) Representative images (single Z slices) of larval ring glands expressing *spok>mitoGFP*  
853 and stained for GFP and MitoTracker Red. Scale bars represent 20  $\mu\text{m}$ . Control genotype  
854 is *kdm5<sup>140</sup>/CyO-GFP* heterozygous internal control animals.
- 855 (D) Quantification of total mitoGFP signal volume in each prothoracic gland normalized by  
856 number of nuclei in that sample. a.u. = arbitrary units. n = 7-13 per genotype tested. ns,  
857 not significant. (Wilcoxon rank sum test). Error bars: mean + s.e.m.
- 858 (E) Quantification of mean mitoGFP signal intensity across each prothoracic gland. a.u. =  
859 arbitrary units. n = 7-13 per genotype tested. ns, not significant. (Wilcoxon rank sum  
860 test). Error bars: mean + s.e.m.
- 861 (F) Quantification of total MitoTracker Red signal sum intensity in each prothoracic gland  
862 normalized by number of nuclei in that sample. a.u. = arbitrary units. n = 7-13 per  
863 genotype tested. ns, not significant. (Wilcoxon rank sum test). Error bars: mean + s.e.m.
- 864 (G) Quantification of mean MitoTracker Red signal intensity across each prothoracic gland.  
865 a.u. = arbitrary units. n = 7-13 per genotype tested. ns, not significant. (Wilcoxon rank  
866 sum test). Error bars: mean + s.e.m.
- 867 (H) Representative image (single Z slice) of larval ring gland expressing *spok>mitoGFP* and  
868 stained for GFP. Insets demonstrate representative cells of each morphological  
869 classification. Yellow arrows indicate fragmented mitochondria within example  
870 Intermediate morphological cell. Scale bars represent 20  $\mu\text{m}$ .
- 871 (I) Quantification of mitoGFP morphological classifications normalized to number of cells  
872 quantified per sample. n = 9-17. \* $p < 0.05$ ; ns, not significant (nonparametric unpaired t  
873 test). Error bars: mean + s.e.m.

874

875 **Figure 6: Model for KDM5-mediated transcriptional regulation of mitochondrial biology in**  
876 **prothoracic gland cells.**

- 877 (A) KDM5 regulates gene expression programs in the prothoracic gland coordinating proper  
878 MAPK signaling and mitochondrial morphology that are critical for development.  
879 Created with BioRender.

880



881 **Supplemental Figure 1: *kdm5<sup>140</sup>* adults with lethality suppressed by MAPK components.**

882 (A-A'') Representative images of *kdm5<sup>140</sup>* adult fly with lethality suppressed by *spok>Egfr<sup>CA</sup>*  
883 (A), *spok>Ras<sup>V12</sup>* (A'), *spok>erk<sup>CA</sup>* (A''). Scale bars represents 750  $\mu$ m.

884

885 **Supplemental Figure 2: Targeted DamID replicate correlations.**

886 Plot showing correlation across binding profiles of Dam:KDM5 TaDa replicates.

887

888 **Supplemental Table S1: Targeted DamID-identified KDM5 target genes.**

889 List of Dam:KDM5-bound genes identified in Targeted DamID.

890

891 **Supplemental Table S2: RNA-seq analysis of *kdm5<sup>140</sup>* ring glands.**

892 wild type vs *kdm5<sup>140</sup>* ring gland RNA-seq data.

893

894 **Supplemental Table S3: Gene Ontology analyses of gene sets.**

895 Full lists of Gene Ontology (GO) terms generated via GO DAVID analyses.

896

897 **References:**

898 ANOAR, S., WOODLING, N. S. & NICCOLI, T. 2021. Mitochondria Dysfunction in Frontotemporal  
899 Dementia/Amyotrophic Lateral Sclerosis: Lessons From Drosophila Models. *Frontiers in*  
900 *Neuroscience*, 15.

901 AUBERT, Y., EGOLF, S. & CAPELL, B. C. 2019. The Unexpected Noncatalytic Roles of Histone  
902 Modifiers in Development and Disease. *Trends Genet*, 35, 645-657.

903 BELALCAZAR, H. M., HENDRICKS, E. L., ZAMURRAD, S., LIEBL, F. L. W. & SECOMBE, J. 2021. The  
904 histone demethylase KDM5 is required for synaptic structure and function at the  
905 Drosophila neuromuscular junction. *Cell Rep*, 34, 108753.

906 BENEVOLENSKAYA, E. V., MURRAY, H. L., BRANTON, P., YOUNG, R. A. & KAELIN, W. G. 2005.  
907 Binding of pRB to the PHD protein RBP2 promotes cellular differentiation. *Molecular*  
908 *Cell*, 18, 623-635.

- 909 BESHIRI, M. L., HOLMES, K. B., RICHTER, W. F., HESS, S., ISLAM, A. B., YAN, Q., PLANTE, L.,  
910 LITOVCHICK, L., GEVRY, N., LOPEZ-BIGAS, N., KAELIN, W. G., JR. & BENEVOLENSKAYA, E.  
911 V. 2012. Coordinated repression of cell cycle genes by KDM5A and E2F4 during  
912 differentiation. *Proc Natl Acad Sci U S A*, 109, 18499-504.
- 913 BLAIR, L. P., CAO, J., ZOU, M. R., SAYEGH, J. & YAN, Q. 2011. Epigenetic Regulation by Lysine  
914 Demethylase 5 (KDM5) Enzymes in Cancer. *Cancers (Basel)*, 3, 1383-1404.
- 915 BORRIE, S. C., BREMS, H., LEGIUS, E. & BAGNI, C. 2017. Cognitive Dysfunctions in Intellectual  
916 Disabilities: The Contributions of the Ras-MAPK and PI3K-AKT-mTOR Pathways. *Annu  
917 Rev Genomics Hum Genet*, 18, 115-142.
- 918 CAO, J., LIU, Z., CHEUNG, W. K., ZHAO, M., CHEN, S. Y., CHAN, S. W., BOOTH, C. J., NGUYEN, D.  
919 X. & YAN, Q. 2014. Histone demethylase RBP2 is critical for breast cancer progression  
920 and metastasis. *Cell Rep*, 6, 868-77.
- 921 CHAN, J., KUMAR, A. & KONO, H. 2022. RNAPII driven post-translational modifications of  
922 nucleosomal histones. *Trends Genet*, 38, 1076-1095.
- 923 CHRISTESEN, D., YANG, Y. T., SOMERS, J., ROBIN, C., SZTAL, T., BATTERHAM, P. & PERRY, T.  
924 2017. Transcriptome Analysis of *Drosophila melanogaster* Third Instar Larval Ring Glands  
925 Points to Novel Functions and Uncovers a Cytochrome p450 Required for Development.  
926 *G3 (Bethesda)*, 7, 467-479.
- 927 CORAZAO-ROZAS, P., GUERRESCHI, P., ANDRÉ, F., GABERT, P.-E., LANCEL, S., DEKIOUK, S.,  
928 FONTAINE, D., TARDIVEL, M., SAVINA, A., QUESNEL, B., MORTIER, L., MARCHETTI, P. &  
929 KLUZA, J. 2016. Mitochondrial oxidative phosphorylation controls cancer cell's life and  
930 death decisions upon exposure to MAPK inhibitors. *Oncotarget*, 7, 39473-39485.
- 931 CRUZ, J., MARTIN, D. & FRANCH-MARRO, X. 2020. Egfr Signaling Is a Major Regulator of  
932 Ecdysone Biosynthesis in the *Drosophila* Prothoracic Gland. *Curr Biol*, 30, 1547-1554 e4.
- 933 DANIELSEN, E. T., MOELLER, M. E., DORRY, E., KOMURA-KAWA, T., FUJIMOTO, Y., TROELSEN, J.  
934 T., HERDER, R., O'CONNOR, M. B., NIWA, R. & REWITZ, K. F. 2014. Transcriptional  
935 Control of Steroid Biosynthesis Genes in the *Drosophila* Prothoracic Gland by Ventral  
936 Veins Lacking and Knirps. *PLoS Genetics*, 10, 1004343.

- 937 DANIELSEN, E. T., MOELLER, M. E. & REWITZ, K. F. 2013. Nutrient signaling and developmental  
938 timing of maturation. *Curr Top Dev Biol*, 105, 37-67.
- 939 DANIELSEN, E. T., MOELLER, M. E., YAMANAKA, N., OU, Q., LAURSEN, J. M., SOENDERHOLM, C.,  
940 ZHUO, R., PHELPS, B., TANG, K., ZENG, J., KONDO, S., NIELSEN, C. H., HARVALD, E. B.,  
941 FAERGEMAN, N. J., HALEY, M. J., O'CONNOR, K. A., KING-JONES, K., O'CONNOR, M. B. &  
942 REWITZ, K. F. 2016. A Drosophila Genome-Wide Screen Identifies Regulators of Steroid  
943 Hormone Production and Developmental Timing. *Dev Cell*, 37, 558-70.
- 944 DARD, L., BELLANCE, N., LACOMBE, D. & ROSSIGNOL, R. 2018. RAS signalling in energy  
945 metabolism and rare human diseases. *Biochimica et Biophysica Acta (BBA) -*  
946 *Bioenergetics*, 1859, 845-867.
- 947 DENG, J., YANG, M., CHEN, Y., CHEN, X., LIU, J., SUN, S., CHENG, H., LI, Y., BIGIO, E. H.,  
948 MESULAM, M., XU, Q., DU, S., FUSHIMI, K., ZHU, L. & WU, J. Y. 2015. FUS Interacts with  
949 HSP60 to Promote Mitochondrial Damage. *PLOS Genetics*, 11, e1005357.
- 950 DI CARA, F. & KING-JONES, K. 2016. The Circadian Clock Is a Key Driver of Steroid Hormone  
951 Production in Drosophila. *Curr Biol*, 26, 2469-2477.
- 952 DRELON, C., BELALCAZAR, H. M. & SECOMBE, J. 2018. The Histone Demethylase KDM5 Is  
953 Essential for Larval Growth in Drosophila. *Genetics*.
- 954 DRELON, C., ROGERS, M. F., BELALCAZAR, H. M. & SECOMBE, J. 2019. The histone demethylase  
955 KDM5 controls developmental timing in Drosophila by promoting prothoracic gland  
956 endocycles. *Development*, 146.
- 957 EBLEN, S. T. 2018. Extracellular Regulated Kinases: Signaling from Ras to ERK Substrates to  
958 Control Biological Outcomes. *Advances in cancer research*, 138, 99-142.
- 959 EL HAYEK, L., TUNCAI, I. O., NIJEM, N., RUSSELL, J., LUDWIG, S., KAUR, K., LI, X., ANDERTON, P.,  
960 TANG, M., GERARD, A., HEINZE, A., ZACHER, P., ALSAIF, H. S., RAD, A., HASSANPOUR, K.,  
961 ABBASZADEGAN, M. R., WASHINGTON, C., DUPONT, B. R., LOUIE, R. J., STUDY, C.,  
962 COUSE, M., FADEN, M., ROGERS, R. C., ABOU JAMRA, R., ELIAS, E. R., MAROOFIAN, R.,  
963 HOULDEN, H., LEHMAN, A., BEUTLER, B. & CHAHROUR, M. H. 2020. KDM5A mutations  
964 identified in autism spectrum disorder using forward genetics. *Elife*, 9.

- 965 FERRAZ, L. S., COSTA, R. T. D., COSTA, C. A. D., RIBEIRO, C. A. J., ARRUDA, D. C., MARIA-ENGLER,  
966 S. S. & RODRIGUES, T. 2020. Targeting mitochondria in melanoma: Interplay between  
967 MAPK signaling pathway and mitochondrial dynamics. *Biochemical Pharmacology*, 178,  
968 114104.
- 969 GALLI, S., JAHN, O., HITT, R., HESSE, D., OPITZ, L., PLESSMANN, U., URLAUB, H., PODEROSO, J. J.,  
970 JARES-ERIJMAN, E. A. & JOVIN, T. M. 2009. A New Paradigm for MAPK: Structural  
971 Interactions of hERK1 with Mitochondria in HeLa Cells. *PLOS ONE*, 4, e7541.
- 972 GRAPHPAD, S. 2023. *Wilcoxon rank sum test and nonparametric unpaired t tests were*  
973 *performed using GraphPad Prism version 9.5.1 for Mac OS X* [Online]. Available:  
974 [www.graphpad.com](http://www.graphpad.com) [Accessed].
- 975 HAQ, R., SHOAG, J., ANDREU-PEREZ, P., YOKOYAMA, S., EDELMAN, H., ROWE, G. C., FREDERICK,  
976 D. T., HURLEY, A. D., NELLORE, A., KUNG, A. L., WARGO, J. A., SONG, J. S., FISHER, D. E.,  
977 ARANY, Z. & WIDLUND, H. R. 2013. Oncogenic BRAF Regulates Oxidative Metabolism via  
978 PGC1 $\alpha$  and MITF. *Cancer Cell*, 23, 302-315.
- 979 HARRINGTON, J., WHEWAY, G., WILLAIME-MORAWEK, S., GIBSON, J. & WALTERS, Z. S. 2022.  
980 Pathogenic KDM5B variants in the context of developmental disorders. *Biochim Biophys*  
981 *Acta Gene Regul Mech*, 1865, 194848.
- 982 HATCH, H. A. M., BELALCAZAR, H. M., MARSHALL, O. J. & SECOMBE, J. 2021. A KDM5-Prospero  
983 transcriptional axis functions during early neurodevelopment to regulate mushroom  
984 body formation. *Elife*, 10.
- 985 HATCH, H. A. M. & SECOMBE, J. 2021. Molecular and cellular events linking variants in the  
986 histone demethylase KDM5C to the intellectual disability disorder Claes-Jensen  
987 syndrome. *FEBS J*.
- 988 HULSEN, T., DE VLIEG, J. & ALKEMA, W. 2008. BioVenn – a web application for the comparison  
989 and visualization of biological lists using area-proportional Venn diagrams. *BMC*  
990 *Genomics*, 9, 488.
- 991 IWASE, S., BERUBE, N. G., ZHOU, Z., KASRI, N. N., BATTAGLIOLI, E., SCANDAGLIA, M. & BARCO,  
992 A. 2017. Epigenetic Etiology of Intellectual Disability. *J Neurosci*, 37, 10773-10782.

- 993 IWASE, S., BROOKES, E., AGARWAL, S., BADEAUX, A. I., ITO, H., VALLIANATOS, C. N., TOMASSY,  
994 G. S., KASZA, T., LIN, G., THOMPSON, A., GU, L., KWAN, K. Y., CHEN, C., SARTOR, M. A.,  
995 EGAN, B., XU, J. & SHI, Y. 2016. A Mouse Model of X-linked Intellectual Disability  
996 Associated with Impaired Removal of Histone Methylation. *Cell Rep*, 14, 1000-9.
- 997 IWASE, S., LAN, F., BAYLISS, P., DE LA TORRE-UBIETA, L., HUARTE, M., QI, H. H., WHETSTINE, J.  
998 R., BONNI, A., ROBERTS, T. M. & SHI, Y. 2007. The X-linked mental retardation gene  
999 SMCX/JARID1C defines a family of histone H3 lysine 4 demethylases. *Cell*, 128, 1077-  
1000 1088.
- 1001 JACOBS, H. T., GEORGE, J. & KEMPPAINEN, E. 2020. Regulation of growth in *Drosophila*  
1002 melanogaster: the roles of mitochondrial metabolism. *The Journal of Biochemistry*, 167,  
1003 267-277.
- 1004 JAVADOV, S., JANG, S. & AGOSTINI, B. 2014. Crosstalk between mitogen-activated protein  
1005 kinases and mitochondria in cardiac diseases: therapeutic perspectives. *Pharmacology &*  
1006 *therapeutics*, 144, 202-225.
- 1007 KAMIYAMA, T. & NIWA, R. 2022. Transcriptional Regulators of Ecdysteroid Biosynthetic  
1008 Enzymes and Their Roles in Insect Development. *Front Physiol*, 13, 823418.
- 1009 KASHATUS, J. A., NASCIMENTO, A., MYERS, L. J., SHER, A., BYRNE, F. L., HOEHN, K. L., COUNTER,  
1010 C. M. & KASHATUS, D. F. 2015. Erk2 Phosphorylation of Drp1 Promotes Mitochondrial  
1011 Fission and MAPK-Driven Tumor Growth. *Molecular Cell*, 57, 537-551.
- 1012 KIM, D. K., JEONG, H., BAE, J., CHA, M.-Y., KANG, M., SHIN, D., HA, S., HYEON, S. J., KIM, H., SUH,  
1013 K., CHOI, M.-S., RYU, H., YU, S.-W., KIM, J.-I., KIM, Y.-S., LEE, S.-W., HWANG, D. & MOOK-  
1014 JUNG, I. 2022. A $\beta$ -induced mitochondrial dysfunction in neural progenitors controls  
1015 KDM5A to influence neuronal differentiation. *Experimental & Molecular Medicine* 2022  
1016 54:9, 54, 1461-1471.
- 1017 KIM, E. K. & CHOI, E. J. 2010. Pathological roles of MAPK signaling pathways in human diseases.  
1018 *Biochim Biophys Acta*, 1802, 396-405.
- 1019 KOLDE, R. 2012. Pheatmap: pretty heatmaps. *R package version*, 1, 726.
- 1020 KONTARIDIS, M. I. & CHENNAPPAN, S. 2022. Mitochondria and the future of RASopathies: the  
1021 emergence of bioenergetics. *The Journal of Clinical Investigation*, 132.

- 1022 LEE, T. I. & YOUNG, R. A. 2013. Transcriptional regulation and its misregulation in disease. *Cell*,  
1023 152, 1237-51.
- 1024 LI, L., GREER, C., EISENMAN, R. N. & SECOMBE, J. 2010. Essential functions of the histone  
1025 demethylase lid. *PLoS Genet*, 6, e1001221.
- 1026 LIAO, Y., SMYTH, G. K. & SHI, W. 2013. featureCounts: an efficient general purpose program for  
1027 assigning sequence reads to genomic features. *Bioinformatics*, 30, 923-930.
- 1028 LIU, H., ZHAI, L., LIU, Y., LU, D., VANDER ARK, A., YANG, T. & KRAWCZYK, C. M. 2023. The histone  
1029 demethylase KDM5C controls female bone mass by promoting energy metabolism in  
1030 osteoclasts. *Sci Adv*, 9, eadg0731.
- 1031 LIU, X., GREER, C. & SECOMBE, J. 2014. KDM5 interacts with Foxo to modulate cellular levels of  
1032 oxidative stress. *PLoS Genet*, 10, e1004676.
- 1033 LIU, X. & SECOMBE, J. 2015. The Histone Demethylase KDM5 Activates Gene Expression by  
1034 Recognizing Chromatin Context through Its PHD Reader Motif. *Cell Rep*, 13, 2219-31.
- 1035 LLORET-LLINARES, M., PEREZ-LLUCH, S., ROSSELL, D., MORAN, T., PONSÁ-COBAS, J., AUER, H.,  
1036 COROMINAS, M. & AZORIN, F. 2012. dKDM5/LID regulates H3K4me3 dynamics at the  
1037 transcription-start site (TSS) of actively transcribed developmental genes. *Nucleic Acids*  
1038 *Research*.
- 1039 LOPEZ-BIGAS, N., KISIEL, T. A., DEWAAL, D. C., HOLMES, K. B., VOLKERT, T. L., GUPTA, S., LOVE,  
1040 J., MURRAY, H. L., YOUNG, R. A. & BENEVOLENSKAYA, E. V. 2008. Genome-wide analysis  
1041 of the H3K4 histone demethylase RBP2 reveals a transcriptional program controlling  
1042 differentiation. *Molecular Cell*, 31, 520-530.
- 1043 LOPEZ-DELISLE, L., RABBANI, L., WOLFF, J., BHARDWAJ, V., BACKOFEN, R., GRÜNING, B.,  
1044 RAMÍREZ, F. & MANKE, T. 2020. pyGenomeTracks: reproducible plots for multivariate  
1045 genomic datasets *Bioinformatics*, 37, 422-423.
- 1046 LOVE, M. I., HUBER, W. & ANDERS, S. 2014. Moderated estimation of fold change and  
1047 dispersion for RNA-seq data with DESeq2. *Genome Biol*, 15, 550.
- 1048 LUO, X., LIAO, C., QUAN, J., CHENG, C., ZHAO, X., BODE, A. M. & CAO, Y. 2019. Posttranslational  
1049 regulation of PGC-1 $\alpha$  and its implication in cancer metabolism. *International Journal of*  
1050 *Cancer*, 145, 1475-1483.

- 1051 MARCHETTI, P., TRINH, A., KHAMARI, R. & KLUZA, J. 2018. Melanoma metabolism contributes  
1052 to the cellular responses to MAPK/ERK pathway inhibitors. *Biochimica et Biophysica*  
1053 *Acta (BBA) - General Subjects*, 1862, 999-1005.
- 1054 MARSHALL, O. J. & BRAND, A. H. 2015. damidseq\_pipeline: an automated pipeline for  
1055 processing DamID sequencing datasets. *Bioinformatics*, 31, 3371-3.
- 1056 MARSHALL, O. J. & BRAND, A. H. 2017. Chromatin state changes during neural development  
1057 revealed by in vivo cell-type specific profiling. *Nat Commun*, 8, 2271.
- 1058 MARSHALL, O. J., SOUTHALL, T. D., CHEETHAM, S. W. & BRAND, A. H. 2016a. Cell-type-specific  
1059 profiling of protein-DNA interactions without cell isolation using targeted DamID with  
1060 next-generation sequencing. *Nat Protoc*, 11, 1586-98.
- 1061 MARSHALL, O. J., SOUTHALL, T. D., CHEETHAM, S. W. & BRAND, A. H. 2016b. *find\_peaks*  
1062 [Online]. Available: [https://github.com/owenjm/find\\_peaks](https://github.com/owenjm/find_peaks) [Accessed 2259915].
- 1063 MCGUIRE, S. E., LE, P. T., OSBORN, A. J., MATSUMOTO, K. & DAVIS, R. L. 2003. Spatiotemporal  
1064 rescue of memory dysfunction in Drosophila. *Science*, 302, 1765-8.
- 1065 MIRABELLA, A. C., FOSTER, B. M. & BARTKE, T. 2016. Chromatin deregulation in disease.  
1066 *Chromosoma*, 125, 75-93.
- 1067 MOELLER, M. E., NAGY, S., GERLACH, S. U., SOEGAARD, K. C., DANIELSEN, E. T., TEXADA, M. J. &  
1068 REWITZ, K. F. 2017. Warts Signaling Controls Organ and Body Growth through  
1069 Regulation of Ecdysone. *Curr Biol*, 27, 1652-1659 e4.
- 1070 MORAN, T., BERNUES, J. & AZORIN, F. 2015. The Drosophila histone demethylase dKDM5/LID  
1071 regulates hematopoietic development. *Dev Biol*, 405, 260-8.
- 1072 MORGAN, M. A. J. & SHILATIFARD, A. 2023. Epigenetic moonlighting: Catalytic-independent  
1073 functions of histone modifiers in regulating transcription. *Sci Adv*, 9, eadg6593.
- 1074 NAGATA, R., AKAI, N., KONDO, S., SAITO, K., OHSAWA, S. & IGAKI, T. 2022. Yorkie drives  
1075 supercompetition by non-autonomous induction of autophagy via bantam microRNA in  
1076 Drosophila. *Current Biology*.
- 1077 NAKAOKA, T., IGA, M., YAMADA, T., KOUJIMA, I., TAKESHIMA, M., ZHOU, X., SUZUKI, Y.,  
1078 OGIHARA, M. H. & KATAOKA, H. 2017. Deep sequencing of the prothoracic gland  
1079 transcriptome reveals new players in insect ecdysteroidogenesis. *PLoS ONE*, 12.

- 1080 NAVARRO-COSTA, P., MCCARTHY, A., PRUDENCIO, P., GREER, C., GUILGUR, L. G., BECKER, J. D.,  
1081 SECOMBE, J., RANGAN, P. & MARTINHO, R. G. 2016. Early programming of the oocyte  
1082 epigenome temporally controls late prophase I transcription and chromatin  
1083 remodelling. *Nat Commun*, 7, 12331.
- 1084 OHGUCHI, H., PARK, P. M. C., WANG, T., GRYDER, B. E., OGIYA, D., KURATA, K., ZHANG, X., LI, D.,  
1085 PEI, C., MASUDA, T., JOHANSSON, C., WIMALASENA, V. K., KIM, Y., HINO, S., USUKI, S.,  
1086 KAWANO, Y., SAMUR, M. K., TAI, Y. T., MUNSHI, N. C., MATSUOKA, M., OHTSUKI, S.,  
1087 NAKAO, M., MINAMI, T., LAUBERTH, S., KHAN, J., OPPERMANN, U., DURBIN, A. D.,  
1088 ANDERSON, K. C., HIDESHIMA, T. & QI, J. 2021. Lysine Demethylase 5A is Required for  
1089 MYC Driven Transcription in Multiple Myeloma. *Blood Cancer Discov*, 2, 370-387.
- 1090 OHGUCHI, Y. & OHGUCHI, H. 2022. Diverse Functions of KDM5 in Cancer: Transcriptional  
1091 Repressor or Activator? *Cancers (Basel)*, 14.
- 1092 OHHARA, Y., KOBAYASHI, S. & YAMANAKA, N. 2017. Nutrient-Dependent Endocycling in  
1093 Steroidogenic Tissue Dictates Timing of Metamorphosis in *Drosophila melanogaster*.  
1094 *PLoS Genet*, 13, e1006583.
- 1095 OHHARA, Y., NAKAMURA, A., KATO, Y. & YAMAKAWA-KOBAYASHI, K. 2019. Chaperonin  
1096 TRiC/CCT supports mitotic exit and entry into endocycle in *Drosophila*. *PLoS Genet*, 15,  
1097 e1008121.
- 1098 OU, Q., ZENG, J., YAMANAKA, N., BRAKKEN-THAL, C., O'CONNOR, M. B. & KING-JONES, K. 2016.  
1099 The Insect Prothoracic Gland as a Model for Steroid Hormone Biosynthesis and  
1100 Regulation. *Cell Rep*, 16, 247-262.
- 1101 PAN, X., CONNACHER, R. P. & O'CONNOR, M. B. 2020. Control of the insect metamorphic  
1102 transition by ecdysteroid production and secretion. *Current Opinion in Insect Science*.
- 1103 PAN, X., NEUFELD, T. P. & O'CONNOR, M. B. 2019. A Tissue- and Temporal-Specific Autophagic  
1104 Switch Controls *Drosophila* Pre-metamorphic Nutritional Checkpoints. *Curr Biol*, 29,  
1105 2840-2851 e4.
- 1106 PAN, X. & O'CONNOR, M. B. 2021. Coordination among multiple receptor tyrosine kinase signals  
1107 controls *Drosophila* developmental timing and body size. *Cell Rep*, 36, 109644.



- 1108 PARONI, G., BOLIS, M., ZANETTI, A., UBEZIO, P., HELIN, K., STALLER, P., GERLACH, L. O.,  
1109 FRATELLI, M., NEVE, R. M., TERAQ, M. & GARATTINI, E. 2018. HER2-positive breast-  
1110 cancer cell lines are sensitive to KDM5 inhibition: definition of a gene-expression model  
1111 for the selection of sensitive cases. *Oncogene*.
- 1112 PERTEA, M., KIM, D., PERTEA, G. M., LEEK, J. T. & SALZBERG, S. L. 2016. Transcript-level  
1113 expression analysis of RNA-seq experiments with HISAT, StringTie and Ballgown. *Nature*  
1114 *Protocols*, 11, 1650-1667.
- 1115 RSTUDIO, T. 2020. *RStudio: Integrated Development for R*. [Online]. Available:  
1116 <http://www.rstudio.com/>. [Accessed].
- 1117 SAINZ DE LA MAZA, D., HOF-MICHEL, S., PHILLIMORE, L., BOKEL, C. & AMOYEL, M. 2022. Cell-  
1118 cycle exit and stem cell differentiation are coupled through regulation of mitochondrial  
1119 activity in the *Drosophila* testis. *Cell Rep*, 39, 110774.
- 1120 SANDOVAL, H., YAO, C. K., CHEN, K., JAISWAL, M., DONTI, T., LIN, Y. Q., BAYAT, V., XIONG, B.,  
1121 ZHANG, K., DAVID, G., CHARNG, W. L., YAMAMOTO, S., DURAIN, L., GRAHAM, B. H. &  
1122 BELLEN, H. J. 2014. Mitochondrial fusion but not fission regulates larval growth and  
1123 synaptic development through steroid hormone production. *Elife*, 3.
- 1124 SECOMBE, J., LI, L., CARLOS, L. S. & EISENMAN, R. N. 2007. The Trithorax group protein Lid is a  
1125 trimethyl histone H3K4 demethylase required for dMyc-induced cell growth. *Genes &*  
1126 *Development*, 21, 537-551.
- 1127 SERASINGHE, M. N., WIEDER, S. Y., RENAULT, T. T., ELKHOLI, R., ASCIOLLA, J. J., YAO, J. L.,  
1128 JABADO, O., HOEHN, K., KAGEYAMA, Y., SESAKI, H. & CHIPUK, J. E. 2015. Mitochondrial  
1129 Division Is Requisite to RAS-Induced Transformation and Targeted by Oncogenic MAPK  
1130 Pathway Inhibitors. *Molecular Cell*, 57, 521-536.
- 1131 SHANNON, P., MARKIEL, A., OZIER, O., BALIGA, N. S., WANG, J. T., RAMAGE, D., AMIN, N.,  
1132 SCHWIKOWSKI, B. & IDEKER, T. 2003. Cytoscape: a software environment for integrated  
1133 models of biomolecular interaction networks. *Genome Res*, 13, 2498-504.
- 1134 SHERMAN, B. T., HAO, M., QIU, J., JIAO, X., BASELER, M. W., LANE, H. C., IMAMICHI, T. &  
1135 CHANG, W. 2022. DAVID: a web server for functional enrichment analysis and functional  
1136 annotation of gene lists (2021 update). *Nucleic Acids Res*, 50, W216-w221.

- 1137 SHIMELL, M. J., PAN, X., MARTIN, F. A., GHOSH, A. C., LEOPOLD, P., O'CONNOR, M. B. &  
1138 ROMERO, N. M. 2018. Prothoracicotropic hormone modulates environmental adaptive  
1139 plasticity through the control of developmental timing. *Development (Cambridge)*, 145.
- 1140 TAIN, L. S., SEHLKE, R., JAIN, C., CHOKKALINGAM, M., NAGARAJ, N., ESSERS, P., RASSNER, M.,  
1141 GRÖNKE, S., FROELICH, J., DIETERICH, C., MANN, M., ALIC, N., BEYER, A. & PARTRIDGE, L.  
1142 2017. A proteomic atlas of insulin signalling reveals tissue-specific mechanisms of  
1143 longevity assurance. *Molecular Systems Biology*, 13.
- 1144 TAYLOR-PAPADIMITRIOU, J. & BURCHELL, J. M. 2022. Histone Methylases and Demethylases  
1145 Regulating Antagonistic Methyl Marks: Changes Occurring in Cancer. *Cells*, 11.
- 1146 TEXADA, M. J., KOYAMA, T. & REWITZ, K. 2020. Regulation of Body Size and Growth Control.  
1147 *Genetics*, 216, 269-313.
- 1148 TEXADA, M. J., MALITA, A., CHRISTENSEN, C. F., DALL, K. B., FAERGEMAN, N. J., NAGY, S.,  
1149 HALBERG, K. A. & REWITZ, K. 2019. Autophagy-Mediated Cholesterol Trafficking  
1150 Controls Steroid Production. *Dev Cell*, 48, 659-671 e4.
- 1151 TIAN, T., LI, X. & ZHANG, J. 2019. mTOR signaling in cancer and mtor inhibitors in solid tumor  
1152 targeting therapy. *International Journal of Molecular Sciences*, 20.
- 1153 TIEFENBOCK, S. K., BALTZER, C., EGLI, N. A. & FREI, C. 2010. The Drosophila PGC-1 homologue  
1154 Spargel coordinates mitochondrial activity to insulin signalling. *EMBO J*, 29, 171-83.
- 1155 TRICARICO, R., NICOLAS, E., HALL, M. J. & GOLEMIS, E. A. 2020. X- and Y-Linked Chromatin-  
1156 Modifying Genes as Regulators of Sex-Specific Cancer Incidence and Prognosis. *Clin*  
1157 *Cancer Res*, 26, 5567-5578.
- 1158 TRUMAN, J. W. & RIDDIFORD, L. M. 2023. Drosophila postembryonic nervous system  
1159 development: a model for the endocrine control of development. *Genetics*, 223,  
1160 iyac184.
- 1161 URYU, O., OU, Q., KOMURA-KAWA, T., KAMIYAMA, T., IGA, M., SYRZYCKA, M., HIROTA, K.,  
1162 KATAOKA, H., HONDA, B. M., KING-JONES, K. & NIWA, R. 2018. Cooperative Control of  
1163 Ecdysone Biosynthesis in Drosophila by Transcription Factors Seance, Ouija Board, and  
1164 Molting Defective. *Genetics*, 208, 605-622.

- 1165 VALLIANATOS, C. N., FARREHI, C., FRIEZ, M. J., BURMEISTER, M., KEEGAN, C. E. & IWASE, S.  
1166 2018. Altered Gene-Regulatory Function of KDM5C by a Novel Mutation Associated  
1167 With Autism and Intellectual Disability. *Front Mol Neurosci*, 11, 104.
- 1168 VARALJAI, R., ISLAM, A. B., BESHIRI, M. L., REHMAN, J., LOPEZ-BIGAS, N. & BENEVOLENSKAYA, E.  
1169 V. 2015. Increased mitochondrial function downstream from KDM5A histone  
1170 demethylase rescues differentiation in pRB-deficient cells. *Genes Dev*, 29, 1817-34.
- 1171 VITHAYATHIL, J., PUCILOWSKA, J. & LANDRETH, G. E. 2018. ERK/MAPK signaling and autism  
1172 spectrum disorders. *Prog Brain Res*, 241, 63-112.
- 1173 WANG, H., FAN, Z., SHLIAHA, P. V., MIELE, M., HENDRICKSON, R. C., JIANG, X. & HELIN, K. 2023.  
1174 H3K4me3 regulates RNA polymerase II promoter-proximal pause-release. *Nature*, 615,  
1175 339-348.
- 1176 WANG, Q., LI, M., WU, T., ZHAN, L., LI, L., CHEN, M., XIE, W., XIE, Z., HU, E., XU, S. & YU, G. 2022.  
1177 Exploring Epigenomic Datasets by ChIPseeker. *Curr Protoc*, 2, e585.
- 1178 WIDMANN, C., GIBSON, S., JARPE, M. B. & JOHNSON, G. L. 1999. Mitogen-Activated Protein  
1179 Kinase: Conservation of a Three-Kinase Module From Yeast to Human. *Physiological*  
1180 *Reviews*, 79, 143-180.
- 1181 WILLIAMSON, K. A., RAINGER, J., FLOYD, J. A. B., ANSARI, M., MEYNERT, A., ALDRIDGE, K. V.,  
1182 RAINGER, J. K., ANDERSON, C. A., MOORE, A. T., HURLES, M. E., CLARKE, A., VAN  
1183 HEYNINGEN, V., VERLOES, A., TAYLOR, M. S., WILKIE, A. O. M. & FITZPATRICK, D. R. 2014.  
1184 Heterozygous loss-of-function mutations in YAP1 cause both isolated and syndromic  
1185 optic fissure closure defects. *American Journal of Human Genetics*, 94, 295-302.
- 1186 WONG, K. K. L., LIAO, J. Z., SHIH, C. R. Y., HARDEN, N. & VERHEYEN, E. M. 2020. Hyperpolarized  
1187 mitochondria accumulate in Drosophila Hipk-overexpressing cells to drive tumor-like  
1188 growth. *Journal of Cell Science*, 133, jcs250944.
- 1189 YAMANAKA, N. 2021. Ecdysteroid signalling in insects—From biosynthesis to gene expression  
1190 regulation. *Advances in Insect Physiology*. Academic Press Inc.
- 1191 YANG, S. H., SHARROCKS, A. D. & WHITMARSH, A. J. 2013. MAP kinase signalling cascades and  
1192 transcriptional regulation. *Gene*, 513, 1-13.

- 1193 YOO, J., KIM, G. W., JEON, Y. H., KIM, J. Y., LEE, S. W. & KWON, S. H. 2022. Drawing a line  
1194 between histone demethylase KDM5A and KDM5B: their roles in development and  
1195 tumorigenesis. *Exp Mol Med*, 54, 2107-2117.
- 1196 ZAMURRAD, S., HATCH, H. A. M., DRELON, C., BELALCAZAR, H. M. & SECOMBE, J. 2018. A  
1197 Drosophila Model of Intellectual Disability Caused by Mutations in the Histone  
1198 Demethylase KDM5. *Cell Rep*, 22, 2359-2369.
- 1199 ZANCONATO, F., CORDENONSI, M. & PICCOLO, S. 2016. YAP/TAZ at the Roots of Cancer. *Cancer*  
1200 *Cell*, 29, 783-803.
- 1201 ZHANG, W. & LIU, H. T. 2002. MAPK signal pathways in the regulation of cell proliferation in  
1202 mammalian cells. *Cell Res*, 12, 9-18.
- 1203

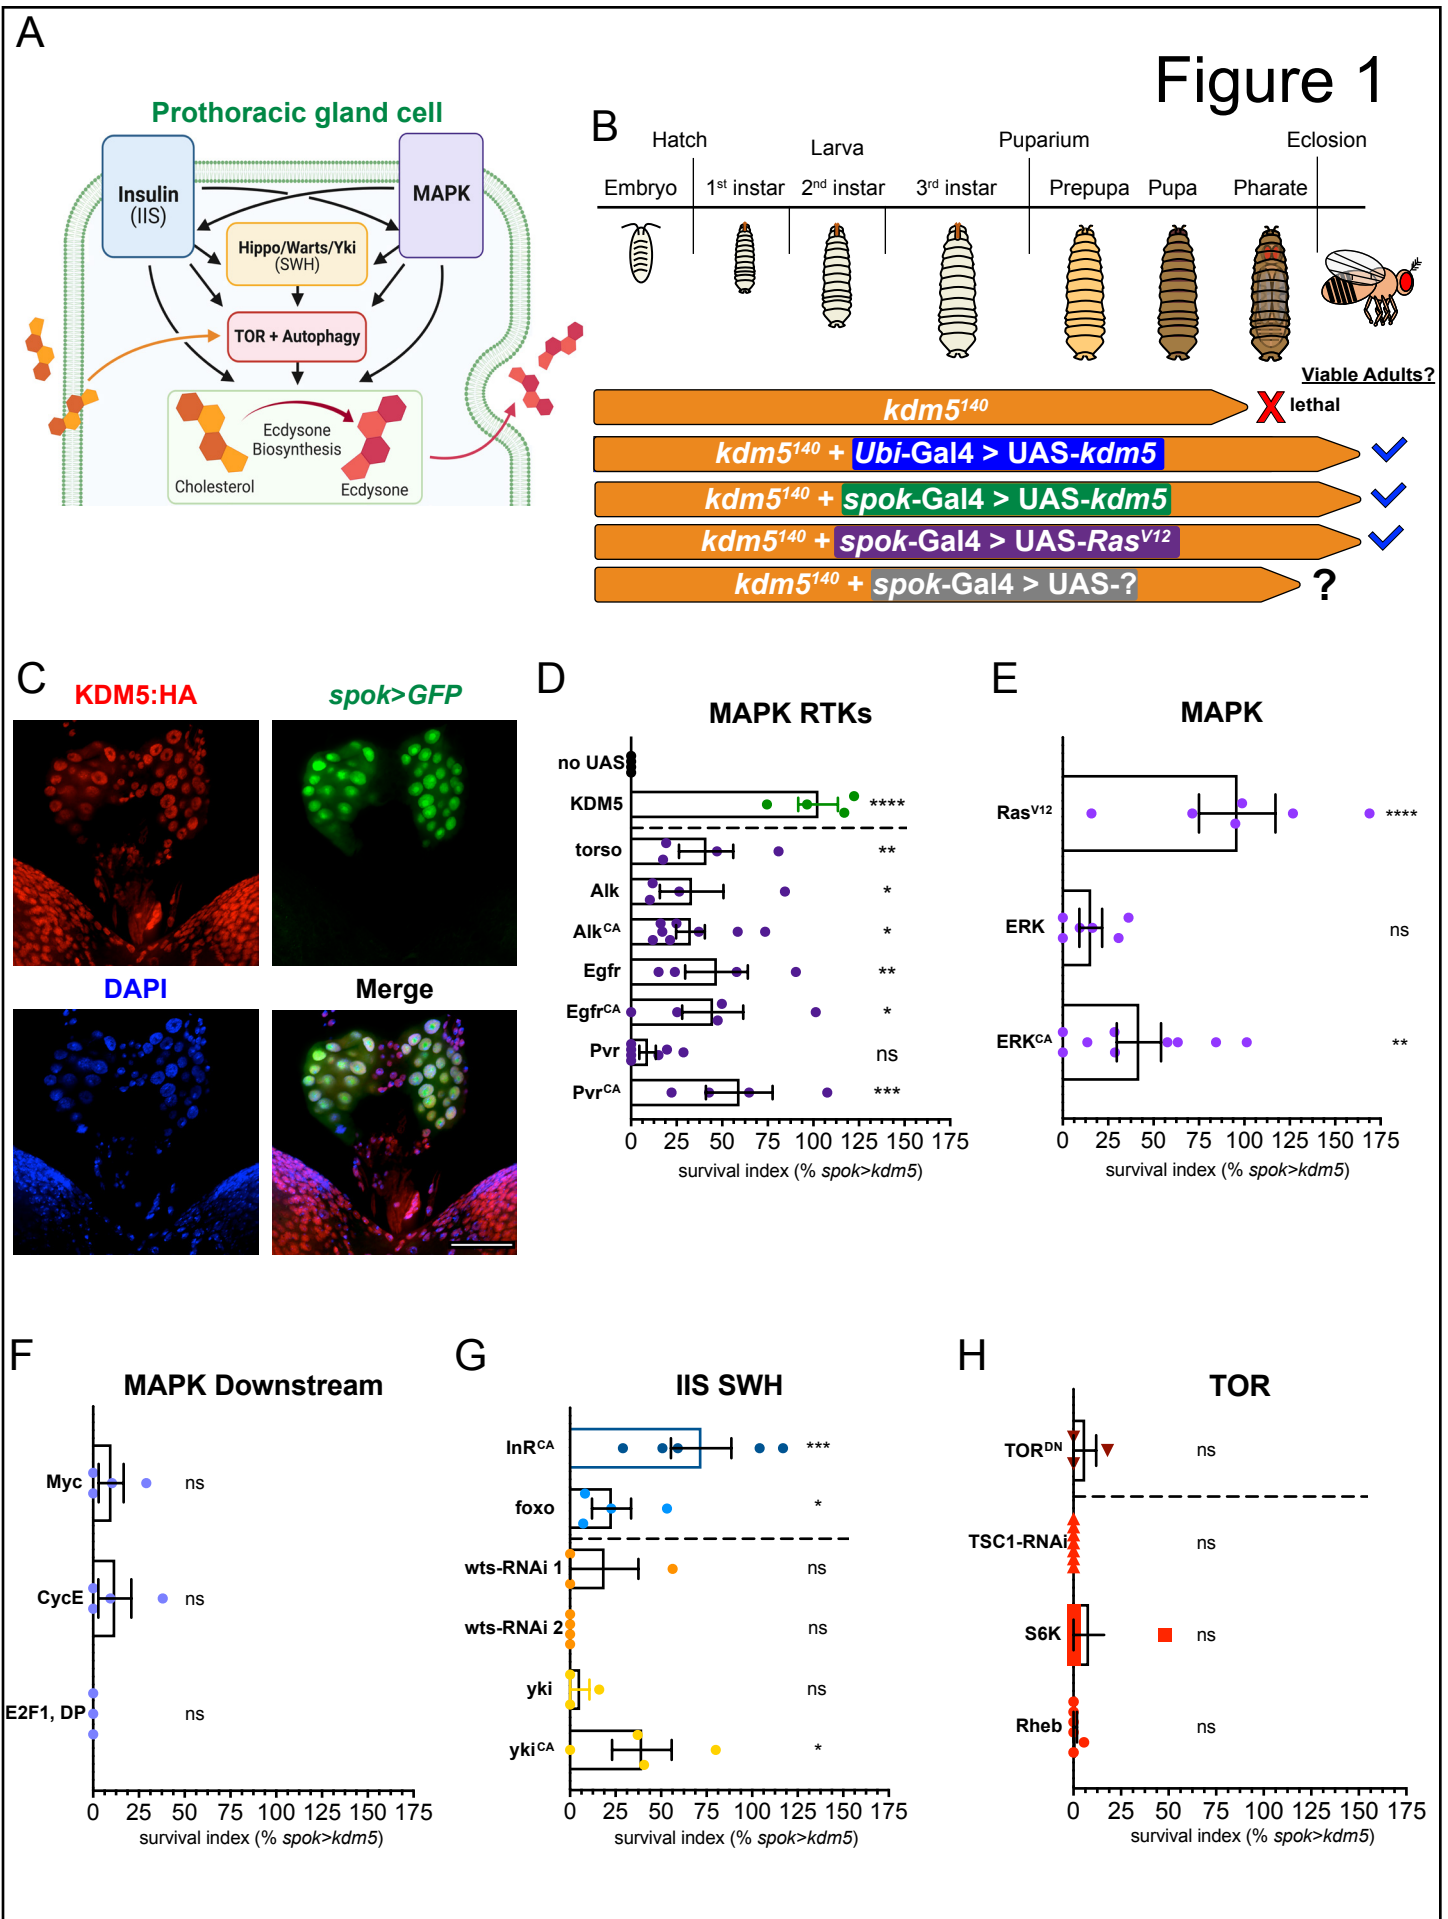

# Figure 2

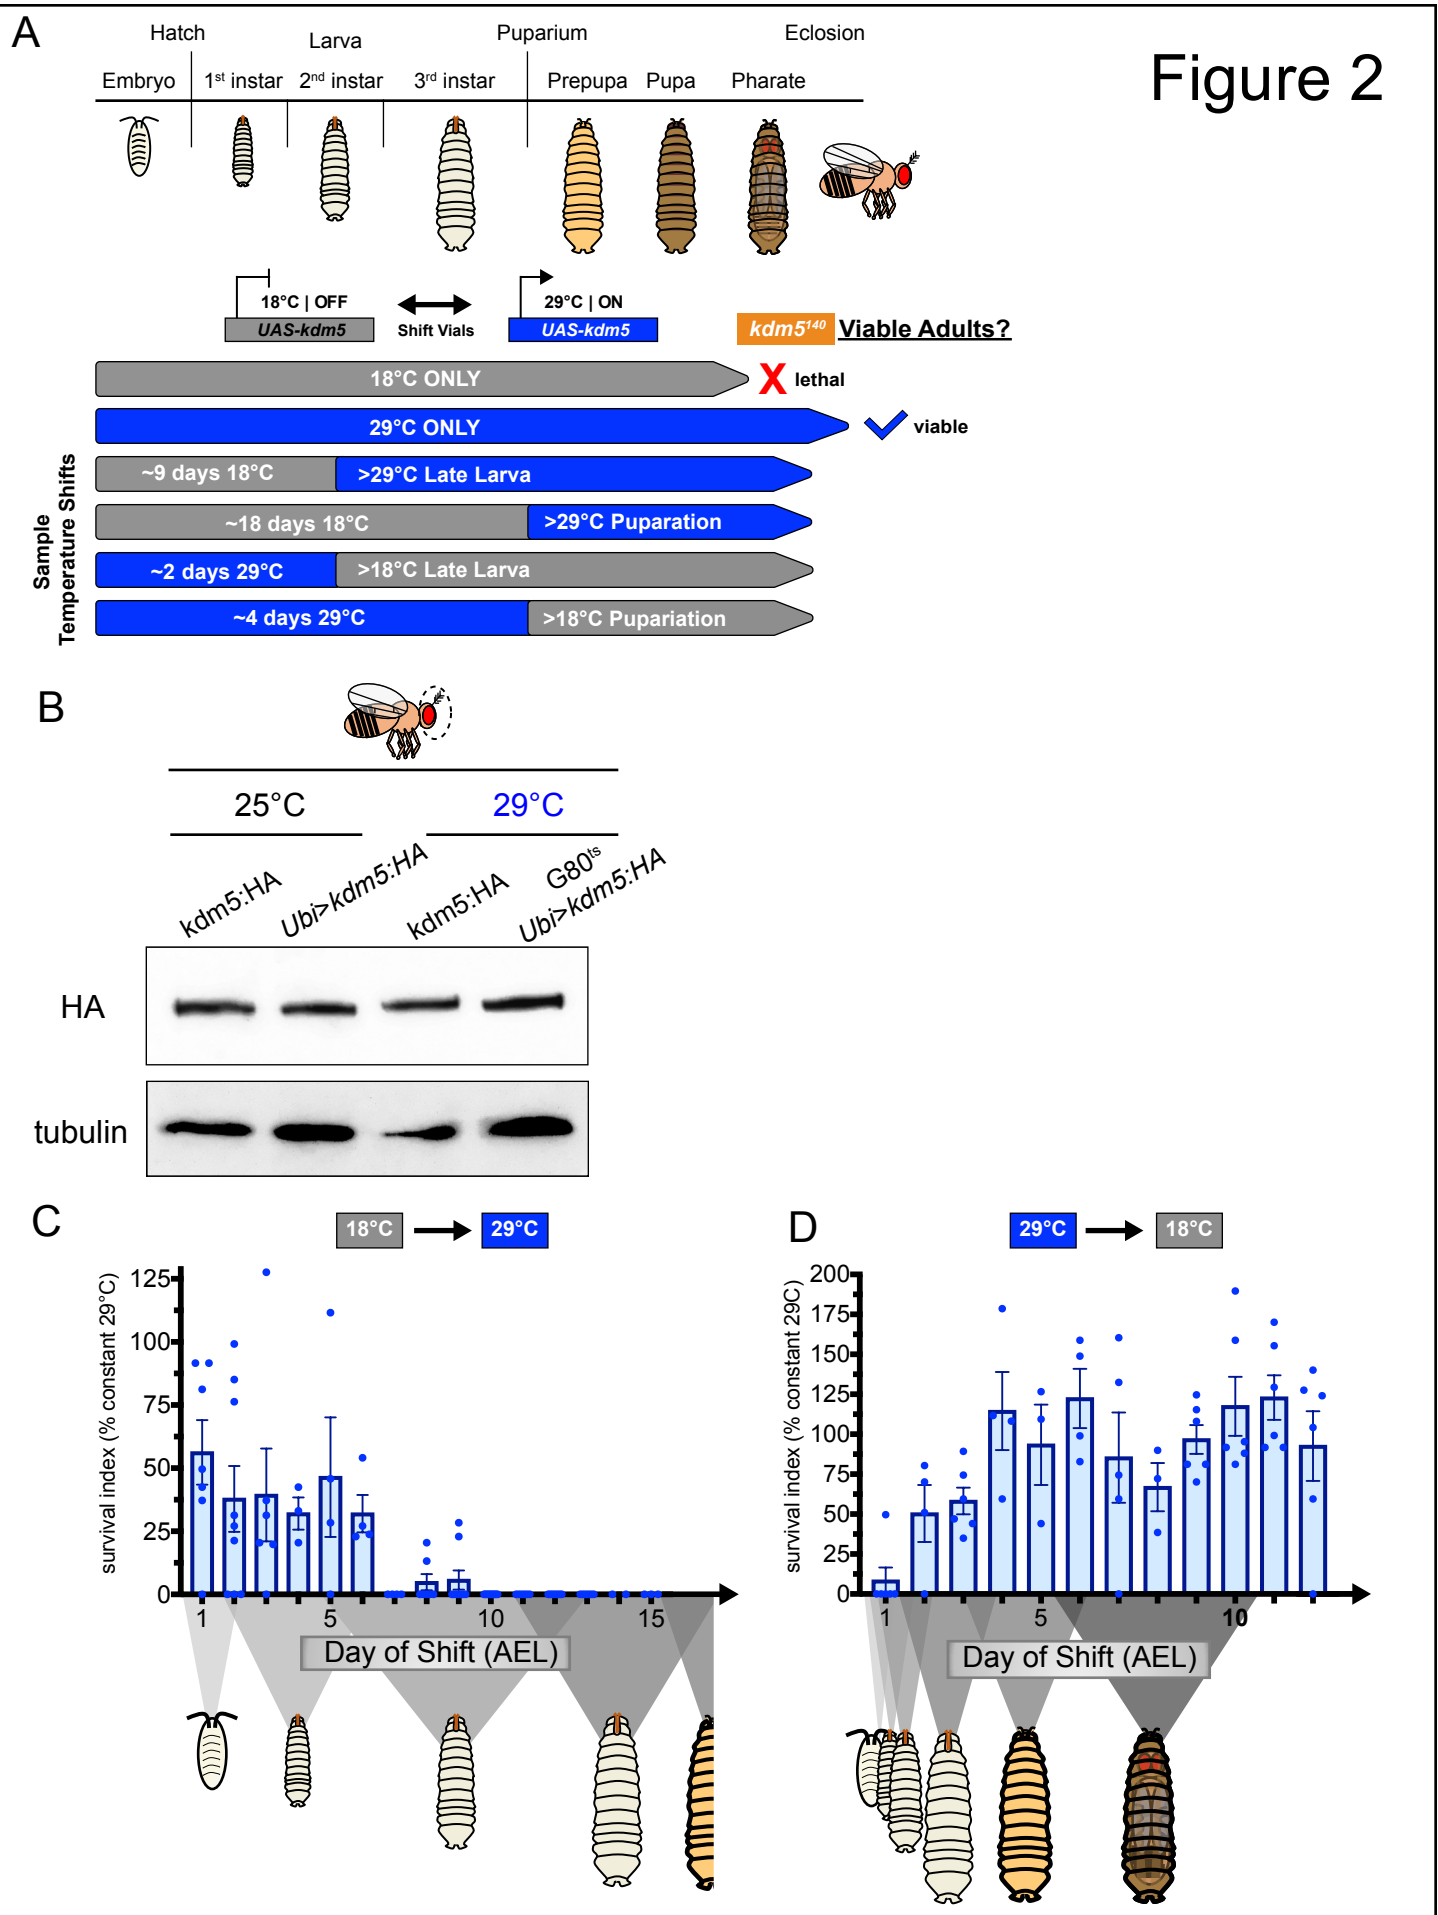

# Figure 3

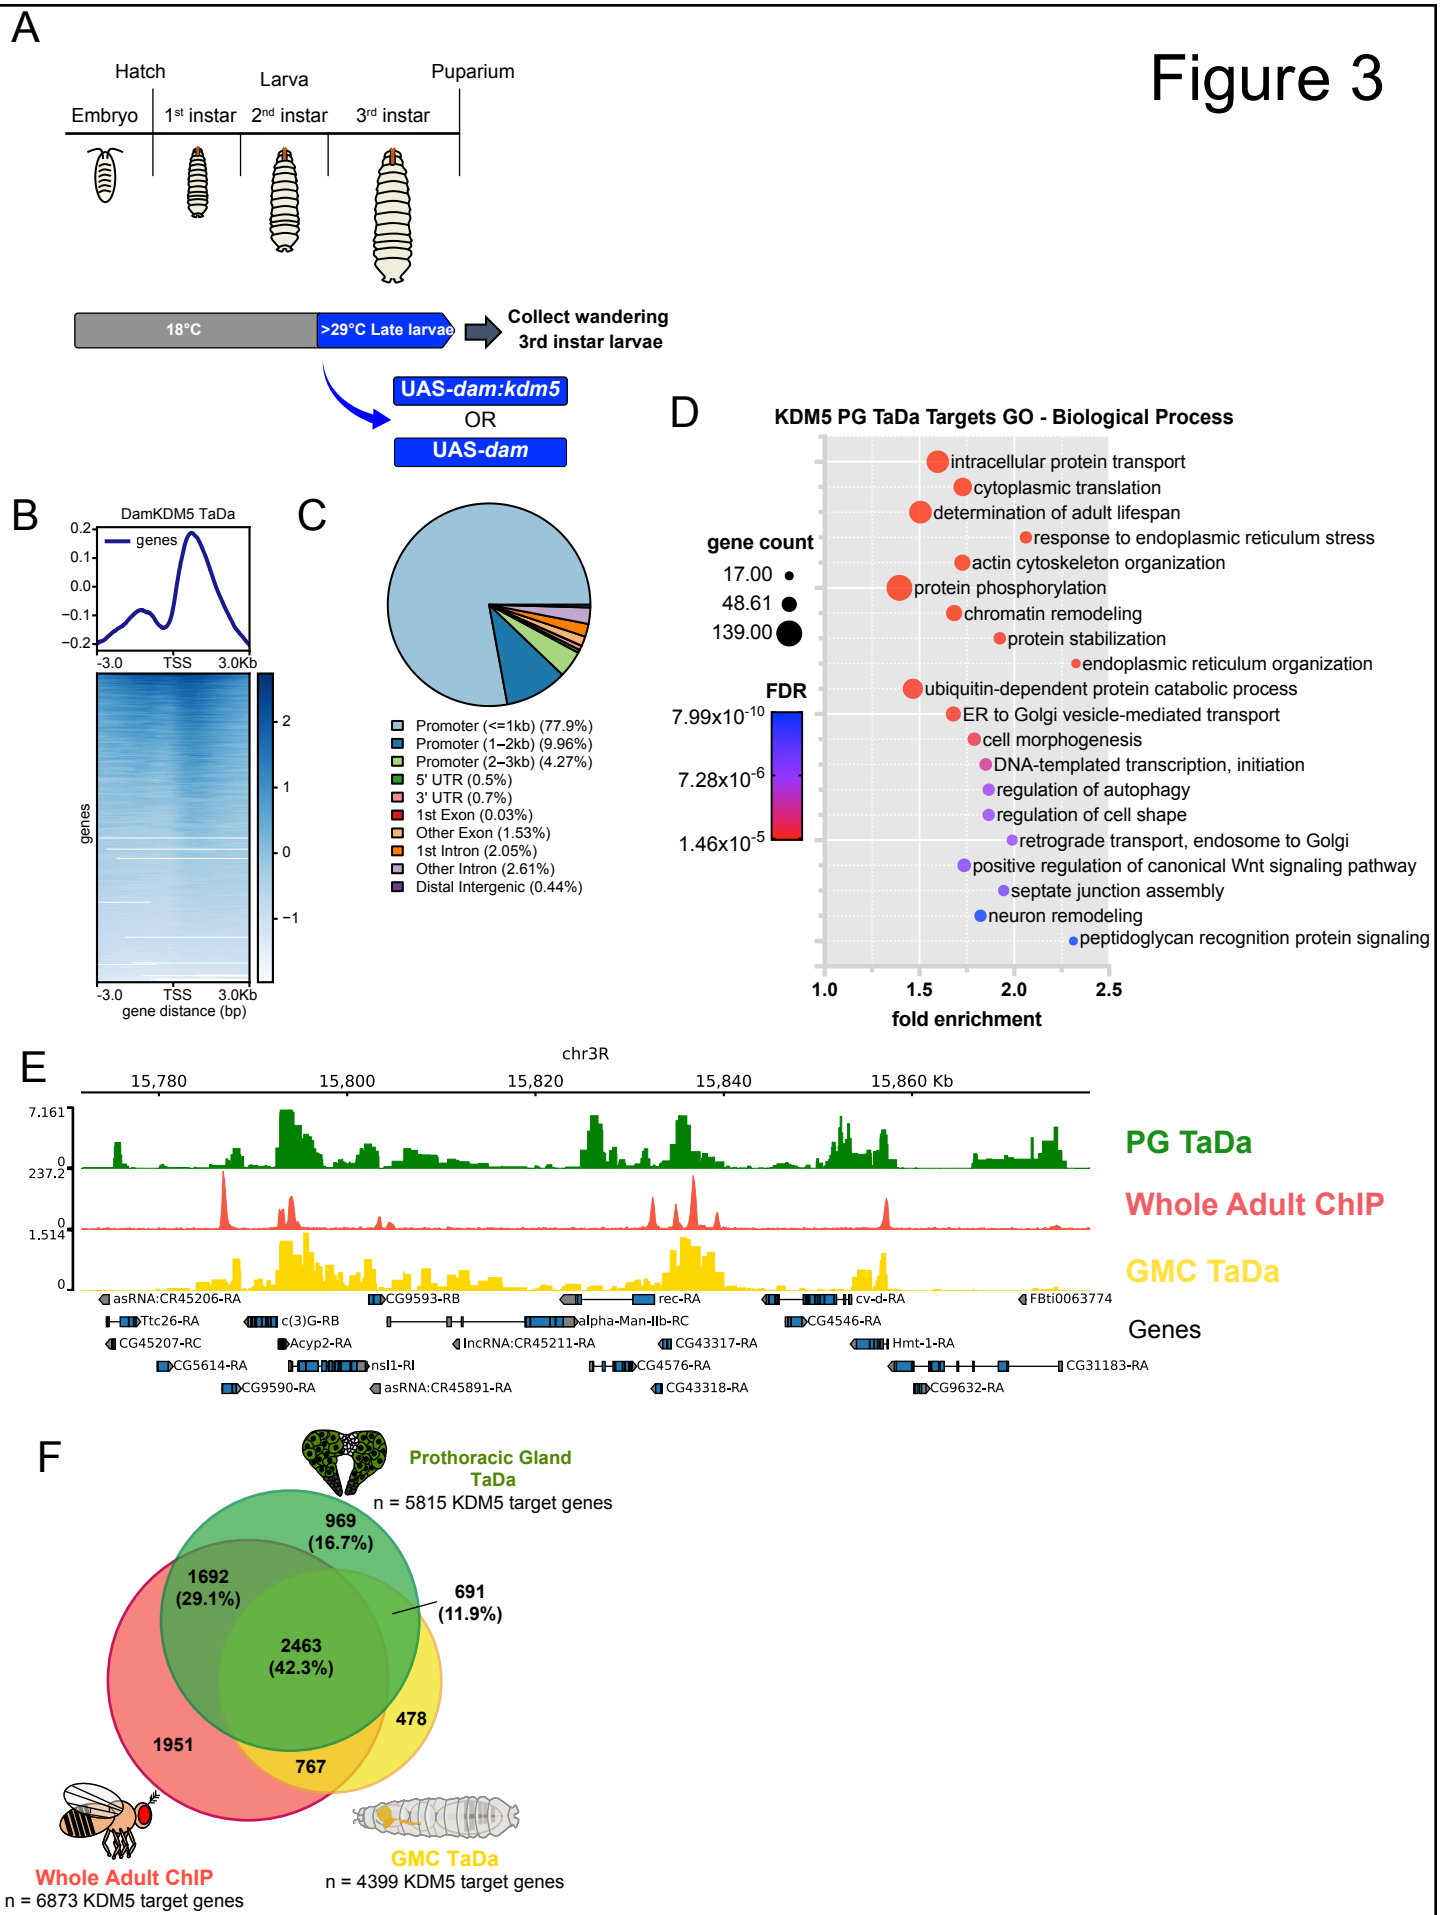

# Figure 4

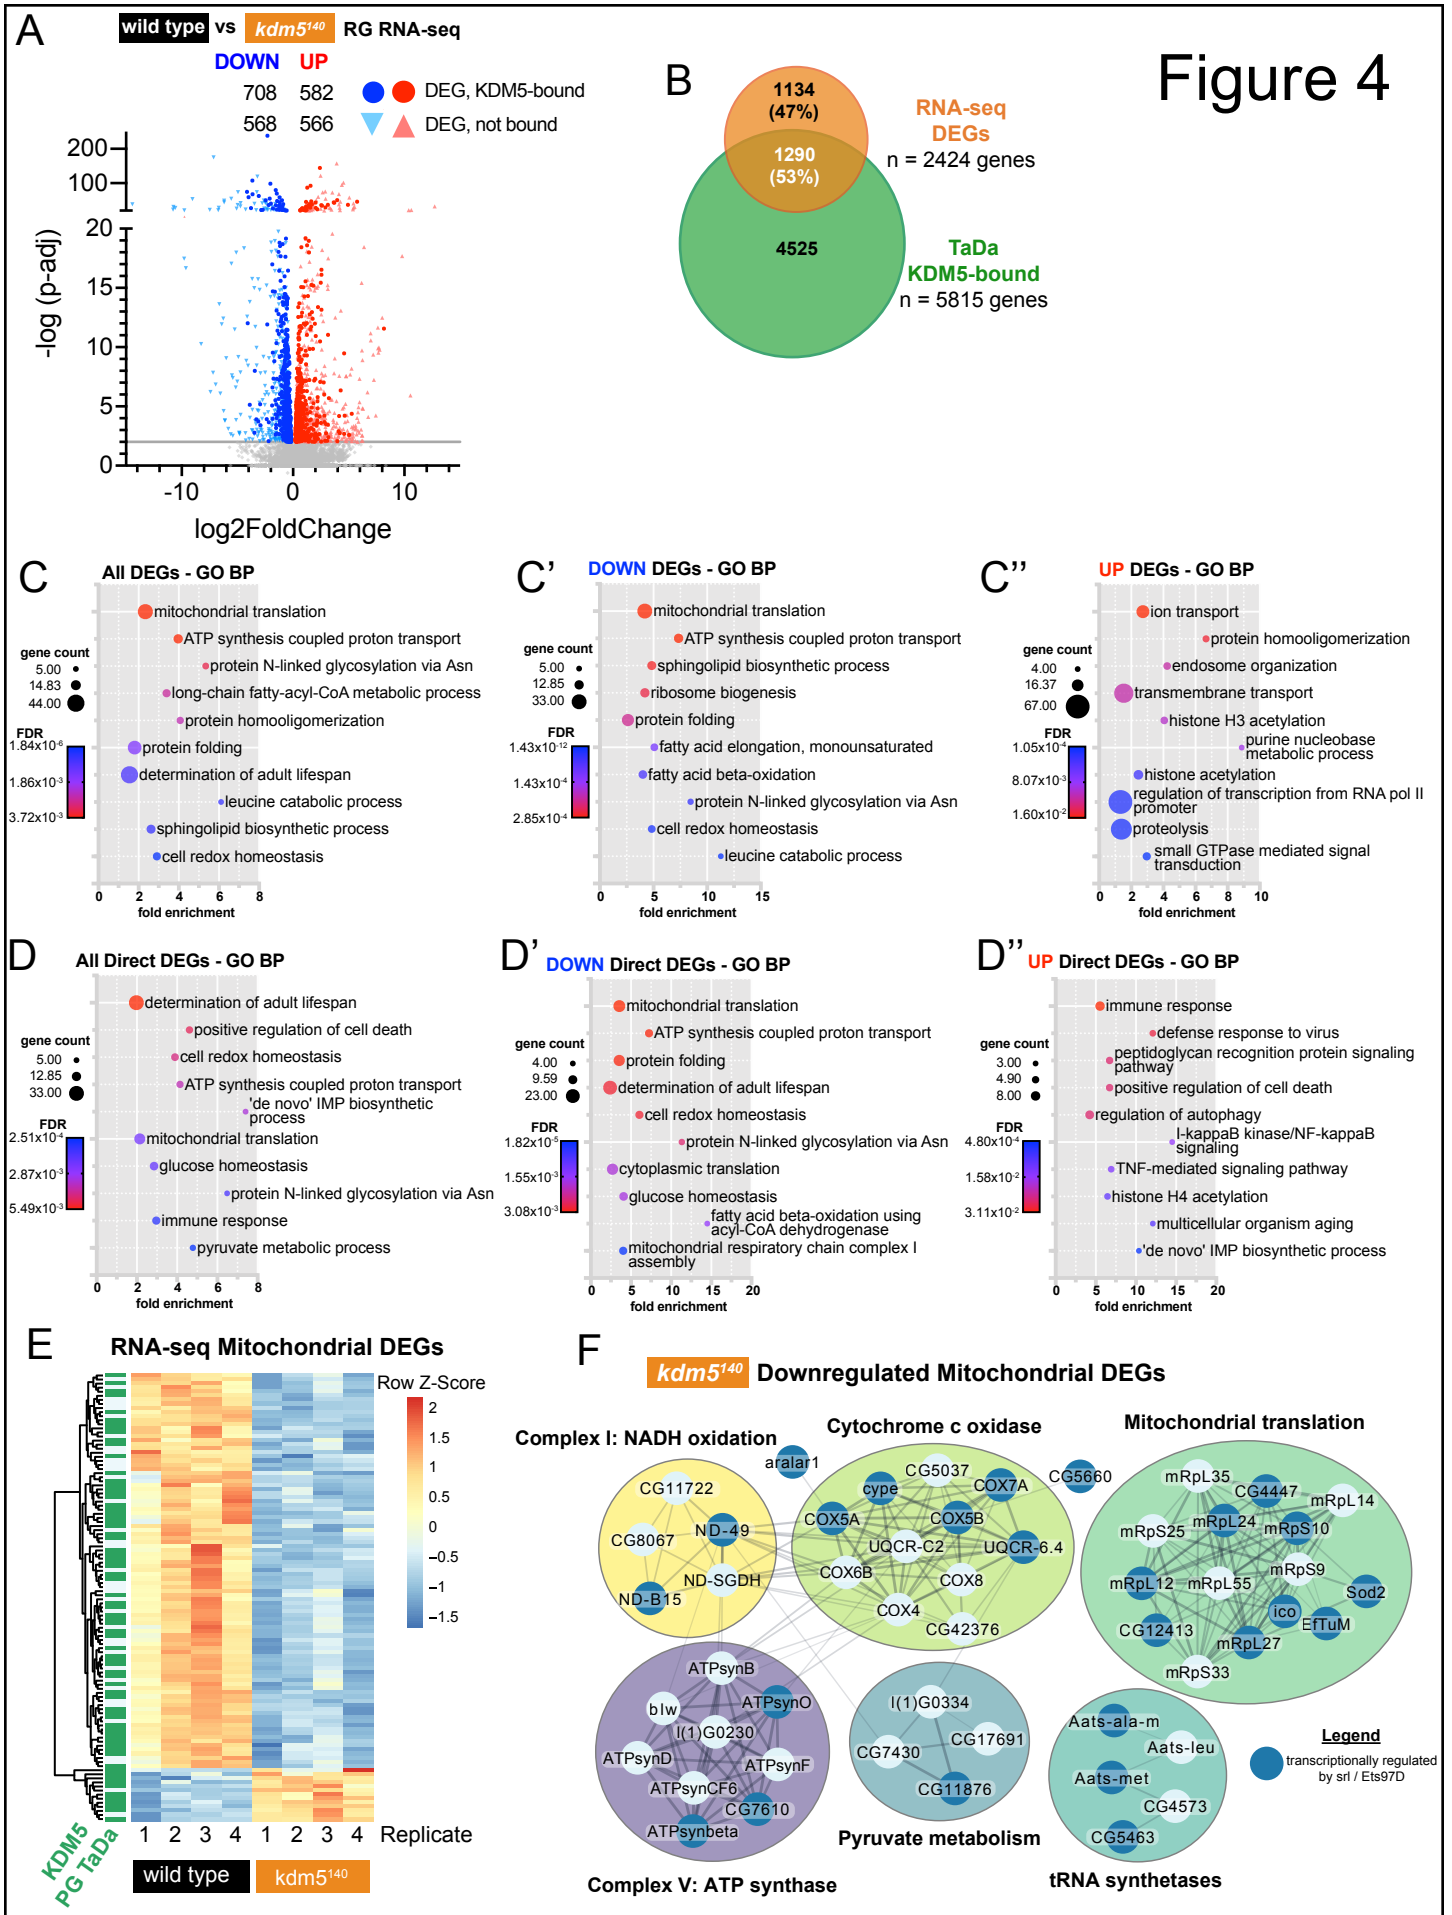



# Figure 5

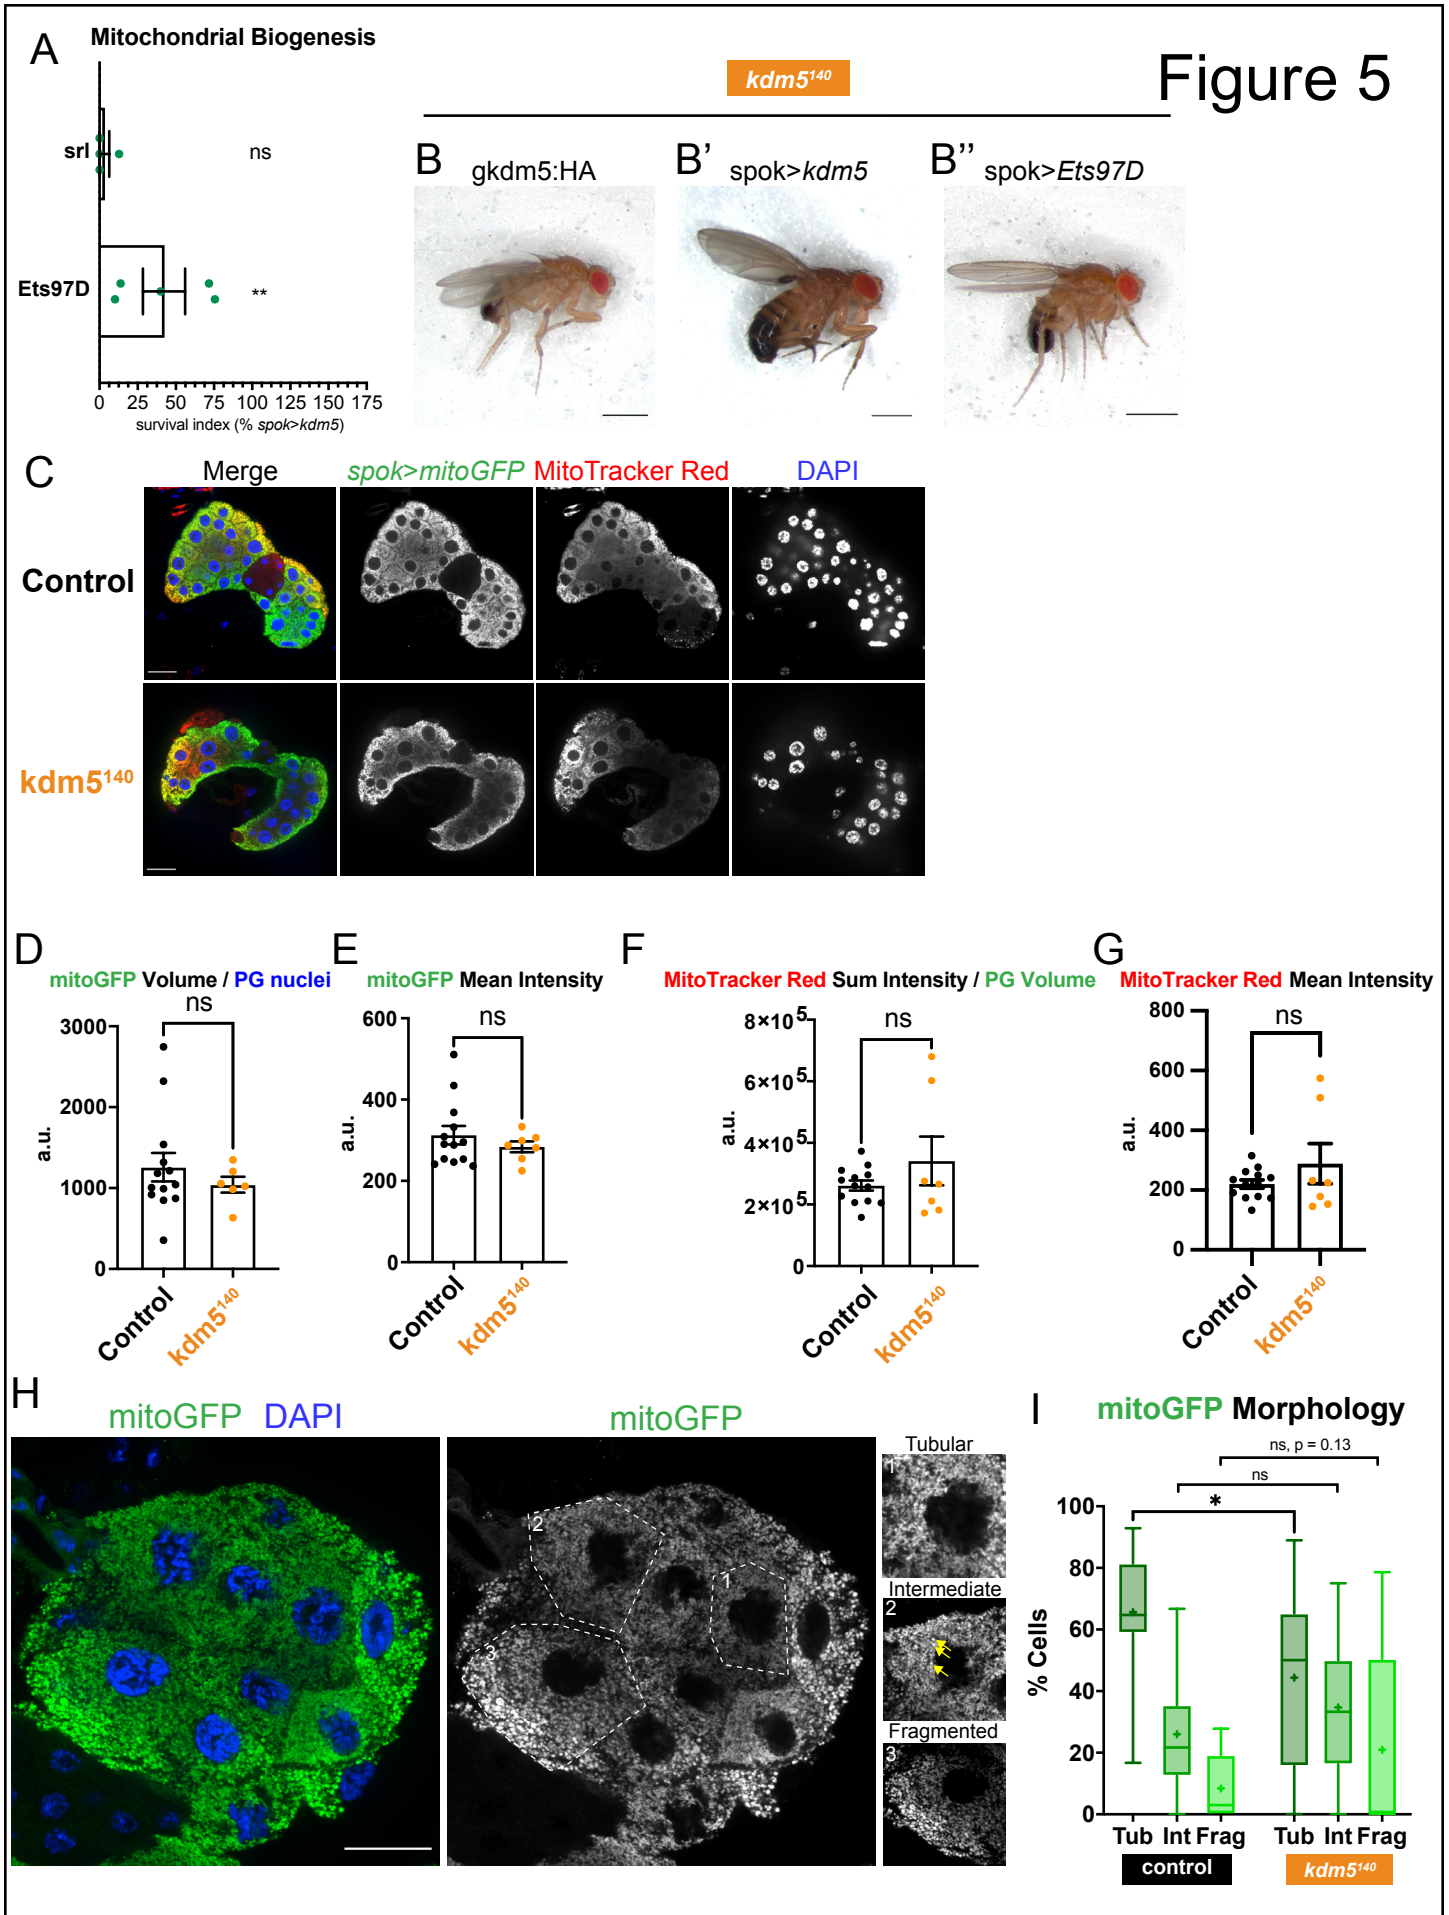

## Figure 6

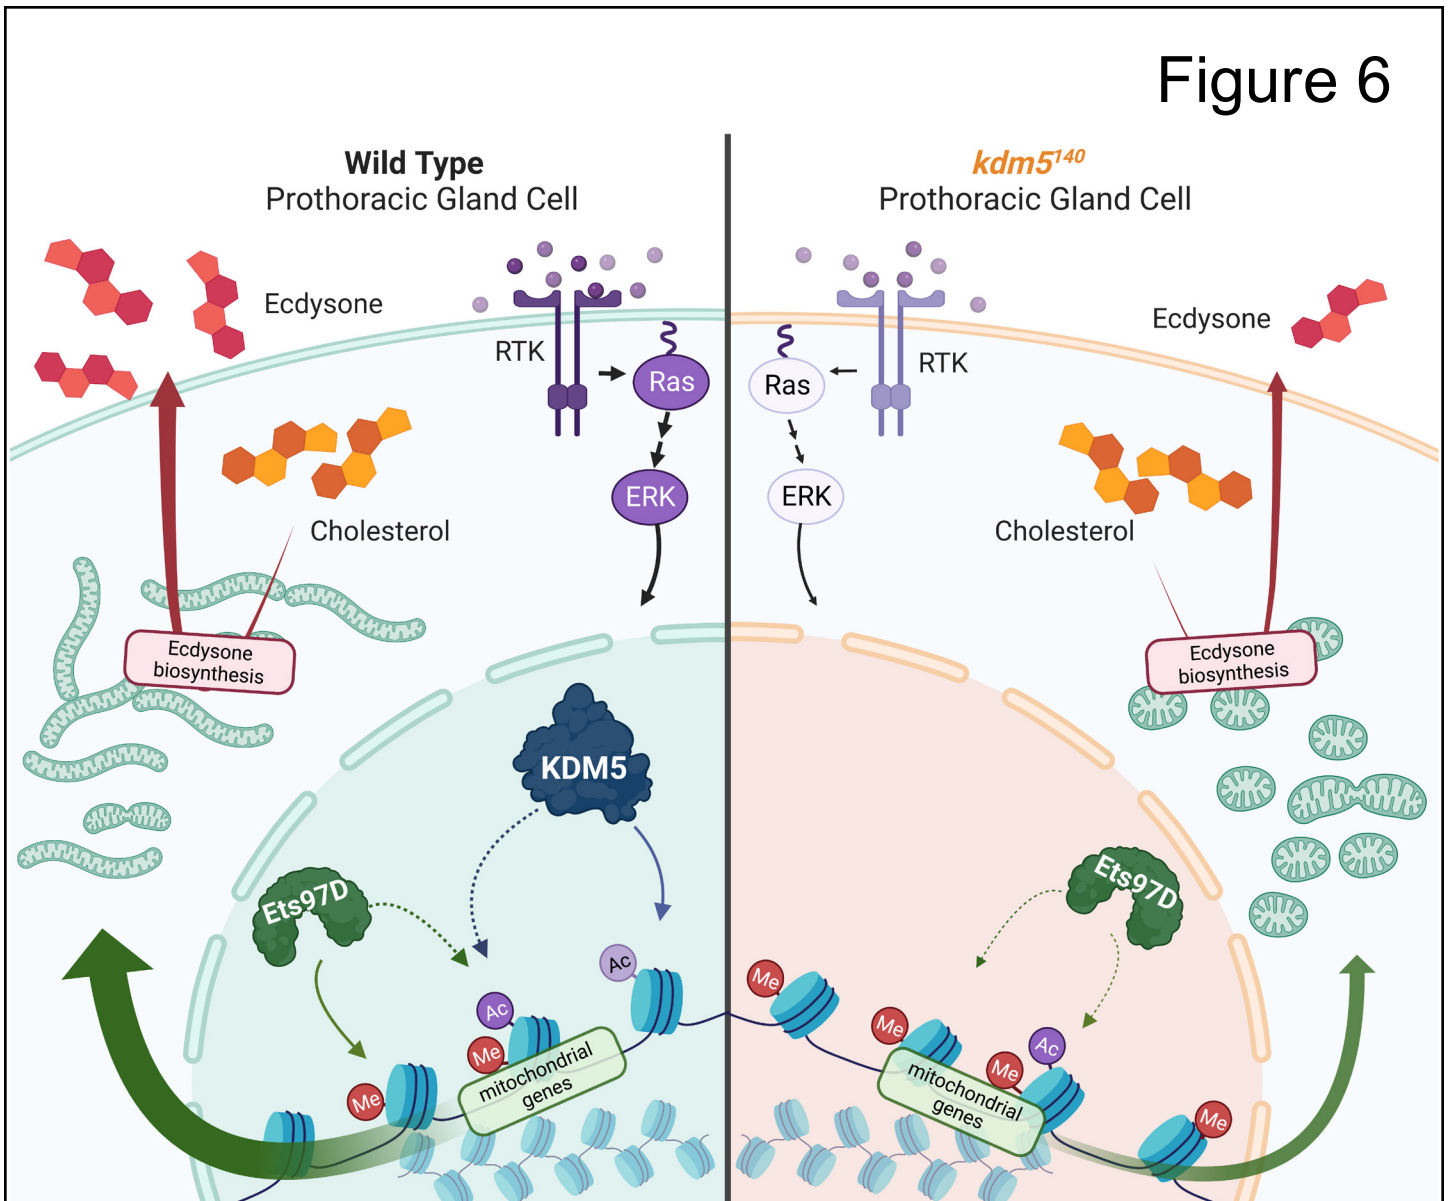

# Supp Fig 1

A

*kdm5<sup>140</sup>*  
*spok>Egfr<sup>CA</sup>*

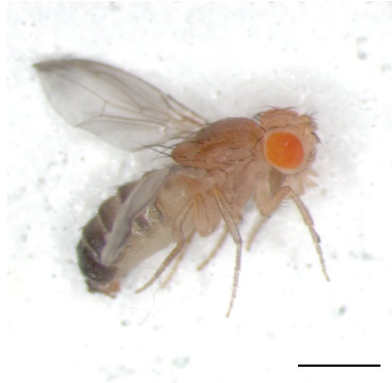

A'

*kdm5<sup>140</sup>*  
*spok>Ras<sup>V12</sup>*

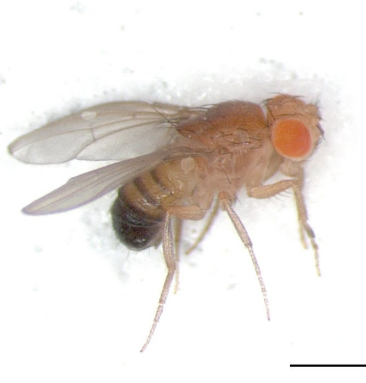

A''

*kdm5<sup>140</sup>*  
*spok>erk<sup>CA</sup>*

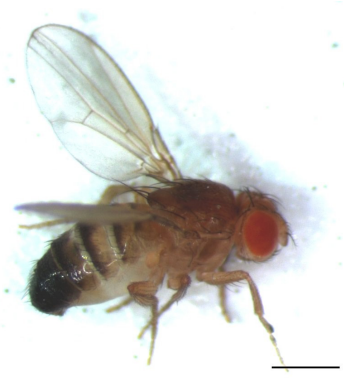

## Supp Fig 2

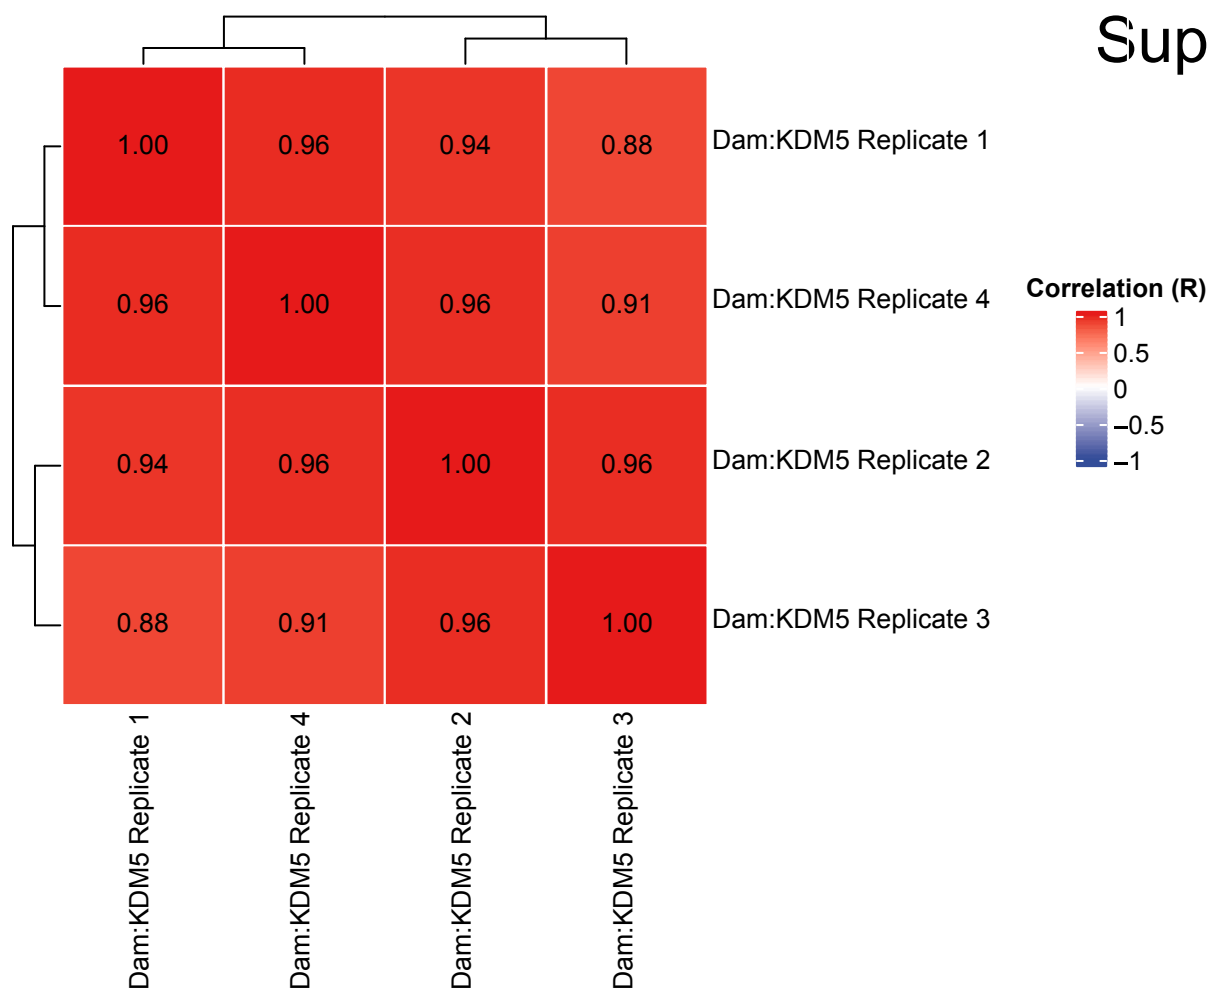

Source: https://www.biorxiv.org/content/10.1101/2023.05.23.541787v1.full.pdf
